# Supplementary material for: Synthesis of bis-exocyclic conjugated diene containing 1,2,3,4-tetrahydroquinoline derivatives via palladium-catalyzed intramolecular Heck cyclization
Source: Royal Society of Chemistry journal article supplement (doi:10.1039/c4ra05900j), 2014-09-08

**Synthesis of bis-exocyclic conjugated diene containing 1,2,3,4-tetrahydroquinoline derivatives via palladium-catalyzed intramolecular Heck cyclization**

Munmun Ghosh, Shubhendu Dhara, Yasin Nuree, Jayanta K. Ray\*

*Department of Chemistry, Indian Institute of Technology, Kharagpur 721 302, India*

Corresponding author: Tel.: +91 3222283326; fax: +91 3222282252.

E-mail address: [jkray@chem.iitkgp.ernet.in](mailto:jkray@chem.iitkgp.ernet.in)

**Supplementary Data**

| <b>Table of Contents</b>                                                                   | <b>Page no.</b> |
|--------------------------------------------------------------------------------------------|-----------------|
| A. General remarks                                                                         | 2               |
| B. General procedures for the experiments and characterization data<br>for compounds 2a-2m | 2-7             |
| C. Copies of $^1\text{H}$ and $^{13}\text{C}$ NMR spectra of compounds 2a-2m               | 8-20            |
| D. Characterization data for compounds 3a-3m                                               | 21-24           |
| E. Copies of $^1\text{H}$ and $^{13}\text{C}$ NMR spectra of compounds 3a-3m               | 25-37           |

## General remarks

All reactions were carried out using oven-dried glassware and commercial grade reagents without further purification. Solvents were dried and distilled following standard protocols prior to use. All yields refer to isolated yields after column purification. Chromatographic separation was done using 60-120 mesh silica gel (Merck). Precoated silica gel 60 F254 TLC sheets (Merck) were used for reaction monitoring. <sup>1</sup>H NMR spectra were recorded on BRUKER-200 (200 MHz) spectrometer. Chemical shifts are reported in ppm from tetramethylsilane with the solvent resonance as the internal standard (deuteriochloroform: 7.26 ppm). <sup>1</sup>H NMR data of compounds are reported using the following abbreviations: chemical shifts ( $\delta$ ), multiplicity (s = singlet, br = broad singlet, d = doublet, t = triplet, dd = doublet of doublet, q = quartet, m = multiplet), and coupling constant ( $J$  in Hz). In case of <sup>13</sup>C NMR data, chemical shifts are reported in ppm from tetramethylsilane with the solvent resonance as the internal standard (deuteriochloroform: 77.23 ppm). EIMS (70 ev) spectra were taken using a VG Autospec mass spectrometer. Petroleum ether refers to the fraction boiling in the range 60-80 °C.

## General procedure for Pd-catalysed Sonogashira Coupling:

To a solution of 2-iodoaniline (1 mmol) in dry Et<sub>3</sub>N (6 mL), ethynyl benzene (1.1 mmol), PdCl<sub>2</sub>(PPh<sub>3</sub>)<sub>2</sub> (5 mol %) and CuI (5 mol %) were added and refluxed for 4-5 h in argon atmosphere. The reaction mixture was cooled to rt and extracted with EtOAc (3×20ml). Combined organic layer was washed with brine and dried over Na<sub>2</sub>SO<sub>4</sub>. The solvent was evaporated under reduced pressure and the crude product was purified through column chromatography using silica gel (60-120 mesh) and pet ether/EtOAc as eluent.

## General procedure for the synthesis of (2-Bromo-allyl)-(2-phenylethynyl-phenyl)-amines (2a-2j):

Previously prepared (2-phenylethynyl-phenyl)-amine (1 mmol) and K<sub>2</sub>CO<sub>3</sub> (2 mmol) were taken in a two-necked round bottom flask in argon atmosphere. 2,3-dibromopropene (1 mmol) and acetonitrile (5 mL) were added and the mixture was refluxed for 10-12 h. After cooling to rt, the reaction mixture was extracted with EtOAc (3×20ml). Combined organic layer was washed with brine and dried over Na<sub>2</sub>SO<sub>4</sub>. The solvent was evaporated under reduced pressure and the crude

product was purified through column chromatography using silica gel (60-120 mesh) and pet ether/EtOAc as eluent.

### General procedure for Heck cyclization:

Compound **2a** (100 mg, 0.32 mmol), HCOONa (32.7 mg, 0.48 mmol), PPh<sub>3</sub> (42.0 mg, 0.16 mmol), and Pd (OAc)<sub>2</sub> (5 mol %, 3.6 mg) were taken in a two-necked round bottomed flask in argon atmosphere. 5 mL of dry DMF was added to the reaction mixture and heated at 80 °C for 4 h. Progress of the reaction was monitored by TLC. After the completion of the reaction the reaction mixture was cooled to rt and extracted with EtOAc (3x20ml). Combined organic layer was washed with brine and dried over Na<sub>2</sub>SO<sub>4</sub>. The solvent was evaporated under reduced pressure and the crude product was purified through column chromatography using silica gel (60-120 mesh) and pet ether:EtOAc (10:1) as eluent.

### Spectral data for compounds 2a-2m:

#### (2-Bromo-allyl)-(2-phenylethynyl-phenyl)-amine (2a):

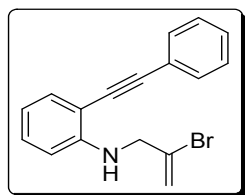

Yellow liquid, Yield = 72%; <sup>1</sup>H NMR (200 MHz in CDCl<sub>3</sub>): δ = 7.66-7.62 (m, 3H), 7.61-7.48 (m, 1H), 7.45-7.33 (m, 3H), 6.84-6.77 (m, 1H), 6.73-6.64 (m, 1H), 5.96 (d, *J* = 1.6 Hz, 1H), 5.66 (s, 1H), 5.33 (br, 1H), 4.17 (s, 2H). <sup>13</sup>C NMR (50 MHz in CDCl<sub>3</sub>): δ = 147.5, 132.4, 131.6 (2C), 130.5, 130.1, 128.6, 128.5, 124.8, 123.2, 117.5, 116.7, 110.2, 108.0, 95.6, 85.7, 51.8. Anal. Calcd. for C<sub>17</sub>H<sub>14</sub>NBr : C: 65.40; H : 4.52; N : 4.49 %; Found : C : 65.32; H : 4.56; N : 4.38 %. HRMS Calcd. for C<sub>17</sub>H<sub>15</sub>BrN<sup>+</sup> [M+H]<sup>+</sup>: 312.0382, Found : 312.0395.

#### (2-Bromo-allyl)-(2-*p*-tolylethynyl-phenyl)-amine (2b):

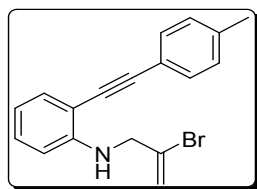

Yellow liquid, Yield = 76%; <sup>1</sup>H NMR (200 MHz in CDCl<sub>3</sub>): δ = 7.51-7.42(m, 3H), 7.30-7.20 (m, 3H), 6.77 (t, *J* = 7.5 Hz, 1H), 6.62 (d, *J* = 8.4 Hz, 1H), 5.93 (d, *J* = 2.0 Hz, 1H), 5.63 (s, 1H), 5.21 (br, 1H), 4.14(s, 2H), 2.43 (s, 3H). <sup>13</sup>C NMR (50 MHz in CDCl<sub>3</sub>): δ = 147.4, 138.6, 132.3, 131.5 (2C), 129.9, 129.3 (2C), 124.9, 120.1, 117.5, 116.7, 110.1, 108.2, 95.72, 85.0, 51.8, 21.7. Anal. Calcd. for C<sub>18</sub>H<sub>16</sub>NBr : C: 66.27; H : 4.94; N : 4.29 %; Found : C : 66.15, H : 4.99, N : 4.22 %. HRMS Calcd. for C<sub>18</sub>H<sub>17</sub>BrN<sup>+</sup> [M+H]<sup>+</sup> : 326.0539; Found : 326.0548.

**(2-Bromo-allyl)-(2-*m*-tolylethynyl-phenyl)-amine (2c):**

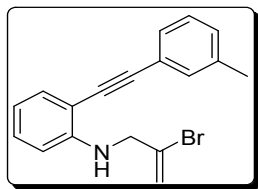

Reddish-yellow liquid, Yield = 68%;  $^1\text{H NMR}$  (200 MHz in  $\text{CDCl}_3$ ):  $\delta$  = 7.55- 7.38 (m, 3H), 7.35-7.26 (m, 4H), 6.84 (t,  $J$  = 7.4 Hz, 1H), 6.70 (d,  $J$  = 8.4 Hz, 1H), 6.00 (d,  $J$  = 1.6 Hz, 1H), 5.70 (d,  $J$  = 1.2 Hz, 1H), 5.33 (br, 1H), 4.22 (s, 2H), 2.49 (s, 3H).  $^{13}\text{C NMR}$  (50 MHz in  $\text{CDCl}_3$ ):  $\delta$  = 147.5, 138.3, 132.4, 132.2, 130.5, 129.4, 128.7, 128.5, 124.9, 123.0, 117.6, 116.7, 110.2, 108.1, 95.8, 85.3, 51.8, 21.4. Anal. Calcd. for  $\text{C}_{18}\text{H}_{16}\text{NBr}$ : C : 66.27; H : 4.9; N : 4.29 %; Found : C : 66.19, H : 4.97, N : 4.19 %. HRMS Calcd. for  $\text{C}_{18}\text{H}_{17}\text{BrN}^+$   $[\text{M}+\text{H}]^+$  : 326.0539; Found : 326.0552.

**(2-Bromo-allyl)-(4-methyl-2-phenylethynyl-phenyl)-amine (2d):**

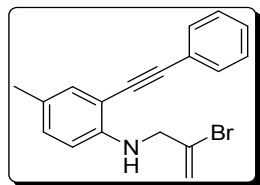

Yellow liquid, Yield = 70%;  $^1\text{H NMR}$  (200 MHz in  $\text{CDCl}_3$ ):  $\delta$  = 7.61-7.56 (m, 2H), 7.41-7.37 (m, 3H), 7.27 (s, 1H), 7.06 (dd,  $J_1$  = 1.6 Hz,  $J_2$  = 8.4 Hz, 1H), 6.54 (d,  $J$  = 8.2 Hz, 1H), 5.91 (d,  $J$  = 1.8 Hz, 1H), 5.61 (d,  $J$  = 1.2 Hz, 1H), 5.11 (br, 1H), 4.11 (s, 2H), 2.28 (s, 3H).  $^{13}\text{C NMR}$  (50 MHz in  $\text{CDCl}_3$ ):  $\delta$  = 145.4, 132.6, 131.6 (2C), 130.9 (2C), 128.6, 128.4 (2C), 126.7, 123.3, 116.6, 110.4, 108.0, 95.3, 85.9, 52.0, 20.4. Anal. Calcd. for  $\text{C}_{18}\text{H}_{16}\text{NBr}$ : C : 66.27; H : 4.94; N : 4.29 %; Found : C : 66.22, H : 4.95, N : 4.24 %. HRMS Calcd. for  $\text{C}_{18}\text{H}_{17}\text{BrN}^+$   $[\text{M}+\text{H}]^+$  : 326.0539; Found : 326.0550.

**(2-Bromo-allyl)-(4-chloro-2-phenylethynyl-phenyl)-amine (2e):**

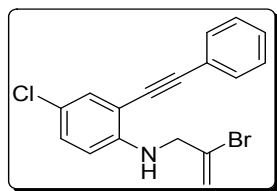

Yellow liquid, Yield = 65%;  $^1\text{H NMR}$  (200 MHz in  $\text{CDCl}_3$ ):  $\delta$  = 7.58-7.53 (m, 2H), 7.40-7.37 (m, 4H), 7.16 (dd,  $J_1$  = 2.6 Hz,  $J_2$  = 8.8 Hz, 1H), 6.50 (d,  $J$  = 9.0 Hz, 1H), 5.86 (d,  $J$  = 2.0 Hz, 1H), 5.60 (d,  $J$  = 1.2 Hz, 1H), 4.09 (s, 2H).  $^{13}\text{C NMR}$  (50 MHz in  $\text{CDCl}_3$ ):  $\delta$  = 146.1, 131.7 (2C), 131.7, 130.1, 129.9, 128.9 (2C), 128.6, 122.7, 122.0, 117.0, 111.4, 109.4, 96.5, 84.4, 51.8. Anal. Calcd. for  $\text{C}_{17}\text{H}_{13}\text{NClBr}$ : C : 76.26, H : 5.27, N : 5.23 %; Found : C : 76.13, H : 5.31, N : 5.11 %. HRMS Calcd. for  $\text{C}_{17}\text{H}_{14}\text{BrClN}^+$   $[\text{M}+\text{H}]^+$  : 345.9993; Found : 346.0009.

**(2-Bromo-allyl)-(4-fluoro-2-phenylethynyl-phenyl)-amine (2f):**

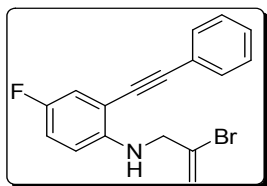

Yellow liquid, Yield = 62%,  $^1\text{H}$  NMR (200 MHz in  $\text{CDCl}_3$ ):  $\delta$  = 7.57-7.52 (m, 2H), 7.39-7.36 (m, 3H), 7.12 (dd,  $J_1 = 2.8$  Hz,  $J_2 = 8.8$  Hz, 1H), 6.99-6.89 (m, 1H), 6.50 (q,  $J = 4.6$  Hz, 1H), 5.87 (d,  $J = 1.6$  Hz, 1H), 5.58 (s, 1H), 5.05 (br, 1H), 4.08 (s, 2H).  $^{13}\text{C}$  NMR (50 MHz in  $\text{CDCl}_3$ ):  $\delta$  = 152.7, 144.2, 131.7 (2C), 130.5, 128.8, 128.6, 124.9 ( $J = 6.0$  Hz), 122.8, 118.4 ( $J = 24.0$  Hz), 117.2, 116.9 ( $J = 5.5$  Hz), 111.2 ( $J = 8.0$  Hz), 108.8 ( $J = 9.0$  Hz), 96.2, 84.7 ( $J = 3.0$  Hz). 52.3. Anal. Calcd. for  $\text{C}_{17}\text{H}_{13}\text{BrFN}$  : C : 61.84, H : 3.97, N : 4.24 %; Found : C : 61.80, H : 4.02, N : 4.13 %. HRMS Calcd. for  $\text{C}_{17}\text{H}_{14}\text{BrFN}^+ [\text{M}+\text{H}]^+$  : 330.0288; Found : 330.0302.

**(2-Bromo-allyl)-(4-fluoro-2-*p*-tolylethynyl-phenyl)-amine (2g):**

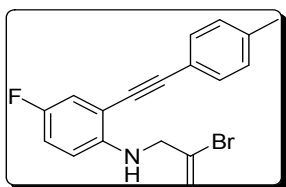

Yellow liquid, Yield = 66%,  $^1\text{H}$  NMR (200 MHz in  $\text{CDCl}_3$ ):  $\delta$  = 7.44 (d,  $J = 7.4$  Hz, 2H), 7.21-7.09 (m, 3H), 6.98-6.89 (m, 1H), 6.45 (q,  $J = 4.6$  Hz, 1H), 5.87 (s, 1H), 5.59 (s, 1H), 5.05 (br, 1H), 4.07 (s, 2H), 2.39 (s, 3H).  $^{13}\text{C}$  NMR (50 MHz in  $\text{CDCl}_3$ ):  $\delta$  = 152.6, 144.1, 139.0, 131.6 (2C), 130.6, 129.4 (2C), 124.8, 119.7, 118.3 ( $J = 23.5$  Hz), 116.9 ( $J = 9.0$  Hz), 111.1 ( $J = 7.5$  Hz), 109.0 ( $J = 9.0$  Hz), 96.5, 84.1, 52.2, 21.7. Anal. Calcd. for  $\text{C}_{18}\text{H}_{15}\text{BrFN}$  : C : 62.81, H : 4.39, N : 4.07 %; Found : C : 62.76, H : 4.41, N : 3.98 %. HRMS Calcd. for  $\text{C}_{18}\text{H}_{16}\text{BrNF}^+ [\text{M}+\text{H}]^+$  : 344.0445; Found : 344.0451.

**(2-Bromo-allyl)-[2-(4-methoxy-phenylethynyl)-4-methyl-phenyl]-amine (2h):**

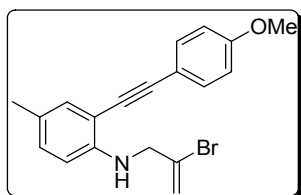

Reddish-yellow liquid, Yield = 75%,  $^1\text{H}$  NMR (200 MHz in  $\text{CDCl}_3$ ):  $\delta$  = 7.51 (d,  $J = 8.8$  Hz, 2H), 7.25 (s, 1H), 7.04 (dd,  $J_1 = 1.8$  Hz,  $J_2 = 8.4$  Hz, 1H), 6.92 (d,  $J = 8.8$  Hz, 2H), 6.53 (d,  $J = 8.4$  Hz, 1H), 5.90 (d,  $J = 1.8$  Hz, 1H), 5.60 (s, 1H), 5.12 (t,  $J = 6.0$  Hz, 1H), 3.85 (s, 5H), 2.28 (s, 3H).  $^{13}\text{C}$  NMR (50 MHz in  $\text{CDCl}_3$ ):  $\delta$  = 159.5, 145.1, 132.9 (2C), 132.3, 130.9, 130.4, 126.3, 116.4, 115.2, 114.0 (2C), 110.2, 108.1, 95.1, 84.5, 55.1, 51.8, 20.2. Anal. Calcd. for  $\text{C}_{19}\text{H}_{18}\text{BrNO}$  : C : 64.06, H : 5.09, N : 3.93 %; Found : C : 63.91, H : 5.14, N : 3.87 %. HRMS Calcd. for  $\text{C}_{19}\text{H}_{19}\text{BrNO}^+ [\text{M}+\text{H}]^+$  : 356.0645; Found : 356.0649.

**(2-Bromo-allyl)-(2,4-dimethyl-6-phenylethynyl-phenyl)-amine (2i):**

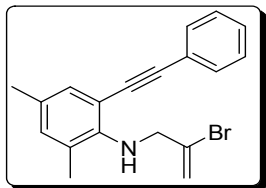

Yellow liquid, Yield = 63%,  $^1\text{H}$  NMR (200 MHz in  $\text{CDCl}_3$ ):  $\delta$  = 7.56-7.51(m, 2H), 7.37-7.34 (m, 3H), 7.16 (s, 1H), 6.93 (s, 1H), 5.90 (s, 1H), 5.54 (d,  $J$  = 1.2 Hz, 1H), 4.23 (s, 2H), 2.30 (s, 3H), 2.25 (s, 3H).  $^{13}\text{C}$  NMR (50 MHz in  $\text{CDCl}_3$ ):  $\delta$  = 144.6, 132.9, 132.3, 131.3, 131.1, 130.0, 128.4, 128.2, 127.4, 123.5, 119.4, 117.7, 113.0, 108.6, 93.9, 87.9, 55.6, 20.4, 18.7. Anal. Calcd. for  $\text{C}_{19}\text{H}_{18}\text{BrN}$  : C : 67.07, 5.33, 4.12 %; Found : C : 66.94, H : 5.36, N : 3.99 %. HRMS Calcd. for  $\text{C}_{19}\text{H}_{19}\text{BrN}^+ [\text{M}+\text{H}]^+$  : 340.0695; Found : 340.0711.

**(2-Bromo-allyl)-(4,5-difluoro-2-phenylethynyl-phenyl)-amine (2j):**

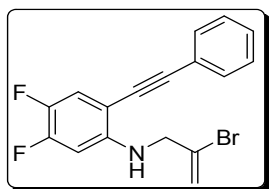

Reddish-yellow liquid, Yield = 60%,  $^1\text{H}$  NMR (200 MHz in  $\text{CDCl}_3$ ):  $\delta$  = 7.61-7.55 (m, 3H), 7.44-7.21 (m, 3H), 6.40 (q,  $J$  = 7.0 Hz, 1H), 5.92 (d,  $J$  = 1.6 Hz, 1H), 5.66 (s, 1H), 5.19 (br, 1H), 4.07 (s, 2H).  $^{13}\text{C}$  NMR (50 MHz in  $\text{CDCl}_3$ ):  $\delta$  = 149.1 ( $J$  = 13.5 Hz), 145.0 ( $J$  = 9.0 Hz), 140.0 ( $J$  = 13.5 Hz), 131.6 (2C), 129.8, 128.6 ( $J$  = 10.5 Hz) (2C), 124.7, 122.6, 120.3 ( $J$  = 18.5 Hz), 117.2, 103.4 ( $J$  = 4.5 Hz), 99.4 ( $J$  = 22.0 Hz), 95.8, 83.8, 52.0. Anal. Calcd. for  $\text{C}_{17}\text{H}_{12}\text{BrF}_2\text{N}$  : C : 58.64, H : 3.47, N : 4.02 %; Found : C : 58.61, H : 3.51, N : 3.89 %. HRMS Calcd. for  $\text{C}_{17}\text{H}_{13}\text{BrF}_2\text{N}^+ [\text{M}+\text{H}]^+$  : 348.0194; Found : 348.0210.

**(2-Bromo-allyl)-(2-trimethylsilanylethynyl-phenyl)-amine (2k):**

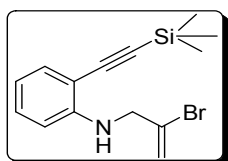

Yellow liquid, Yield = 66 %,  $^1\text{H}$  NMR (200 MHz in  $\text{CDCl}_3$ ):  $\delta$  = 7.34-7.22 (m, 1H), 7.18-7.14 (m, 1H), 6.69-6.62 (m, 1H), 6.54 (d,  $J$  = 8.2 Hz, 1H), 5.86 (d,  $J$  = 2.0 Hz, 1H), 5.56 (s, 1H), 5.15 (br, 1H), 4.07 (d,  $J$  = 3.8 Hz, 2H), 0.27 (s, 9H),  $^{13}\text{C}$  NMR (50 MHz in  $\text{CDCl}_3$ ):  $\delta$  = 148.0, 132.5, 130.4, 130.3, 117.3, 116.7, 110.0, 107.9, 101.8, 100.7, 51.7, 0.3 (3C). Anal. Calcd. for  $\text{C}_{14}\text{H}_{18}\text{BrNSi}$  : C : 54.54, H : 5.89, N : 4.54 %; Found : C : 54.48, H : 5.91, N : 4.50 %. HRMS Calcd. for  $\text{C}_{14}\text{H}_{19}\text{BrNSi}^+ : [\text{M}+\text{H}]^+$  : 308.0465; Found : 308.478.

**(2-Bromo-allyl)-[2-(4-fluorophenylethynyl)-phenyl]-amine (2l):**

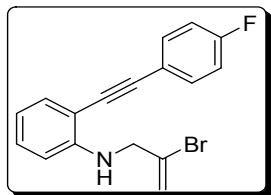

Yellow liquid, Yield = 61 % ,  $^1\text{H}$  NMR (200 MHz in  $\text{CDCl}_3$ ):  $\delta$  = 7.56-7.49 ( m, 2H), 7.39 (dd,  $J_1$  = 1.2 Hz,  $J_2$  = 7.6 Hz, 1H), 7.22-7.18 (m, 1H), 7.06 (t,  $J$  = 8.6 Hz, 2H), 6.72 ( td,  $J_1$  = 1.0 Hz,  $J_2$  = 7.6 Hz, 1H), 6.63 (d,  $J$  = 8.4 Hz, 1H), 5.88 (d,  $J$  = 1.8 Hz, 1H), 5.59 (d,  $J$  = 0.6 Hz, 1H), 5.18 (br, 1H), 4.11 (d,  $J$  = 5.2 Hz, 2H),  $^{13}\text{C}$  NMR (50 MHz in  $\text{CDCl}_3$ ):  $\delta$  = 164.9, 147.4, 133.5, 133.3, 132.3, 130.5, 130.1, 119.3 ( $J$  = 3.5 Hz), 117.5, 116.6, 115.9, 115.5, 110.2, 107.7, 94.4, 85.5, 51.6. Anal. Calcd. for  $\text{C}_{17}\text{H}_{13}\text{BrFN}$  : C : 61.84, H : 3.97, N : 4.24 %; Found : C : 61.82, H : 4.01, N : 4.18 %. HRMS Calcd. for  $\text{C}_{17}\text{H}_{14}\text{BrFN}^+$  [ $\text{M}+\text{H}$ ] $^+$  : 330.0288; Found : 330.0299.

**(2-Bromo-allyl)-methyl-(2-phenylethynyl-phenyl)-amine (2m):**

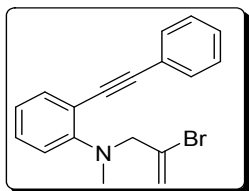

Light yellow liquid, Yield = 70 % ,  $^1\text{H}$  NMR (200 MHz in  $\text{CDCl}_3$ ):  $\delta$  = 7.56-7.52 (m, 3H), 7.34 (dd,  $J_1$  = 2.0 Hz,  $J_2$  = 5.0 Hz, 5H), 6.97 (d,  $J$  = 7.6 Hz, 1H), 6.02 (d,  $J$  = 1.6 Hz, 1H), 5.63 (d,  $J$  = 1.4 Hz, 1H), 4.30 (s, 2H), 2.99 (s, 3H),  $^{13}\text{C}$  NMR (50 MHz in  $\text{CDCl}_3$ ):  $\delta$  = 152.6, 134.7, 131.5, 131.4, 130.7, 129.3, 128.5, 128.3, 128.1, 123.8, 120.7, 117.7, 117.2, 114.2, 94.7, 88.6, 63.3, 39.5. Anal. Calcd. For  $\text{C}_{18}\text{H}_{16}\text{BrN}$  : C : 66.27, H : 4.94, N : 4.29 %; Found : C : 66.25, H : 5.03, N : 4.18 %. HRMS Calcd. for  $\text{C}_{18}\text{H}_{17}\text{BrN}^+$  [ $\text{M}+\text{H}$ ] $^+$  : 326.0539; Found : 326.0555.

**<sup>1</sup>H NMR (CDCl<sub>3</sub>, 200 MHz) Spectrum of (2a):**

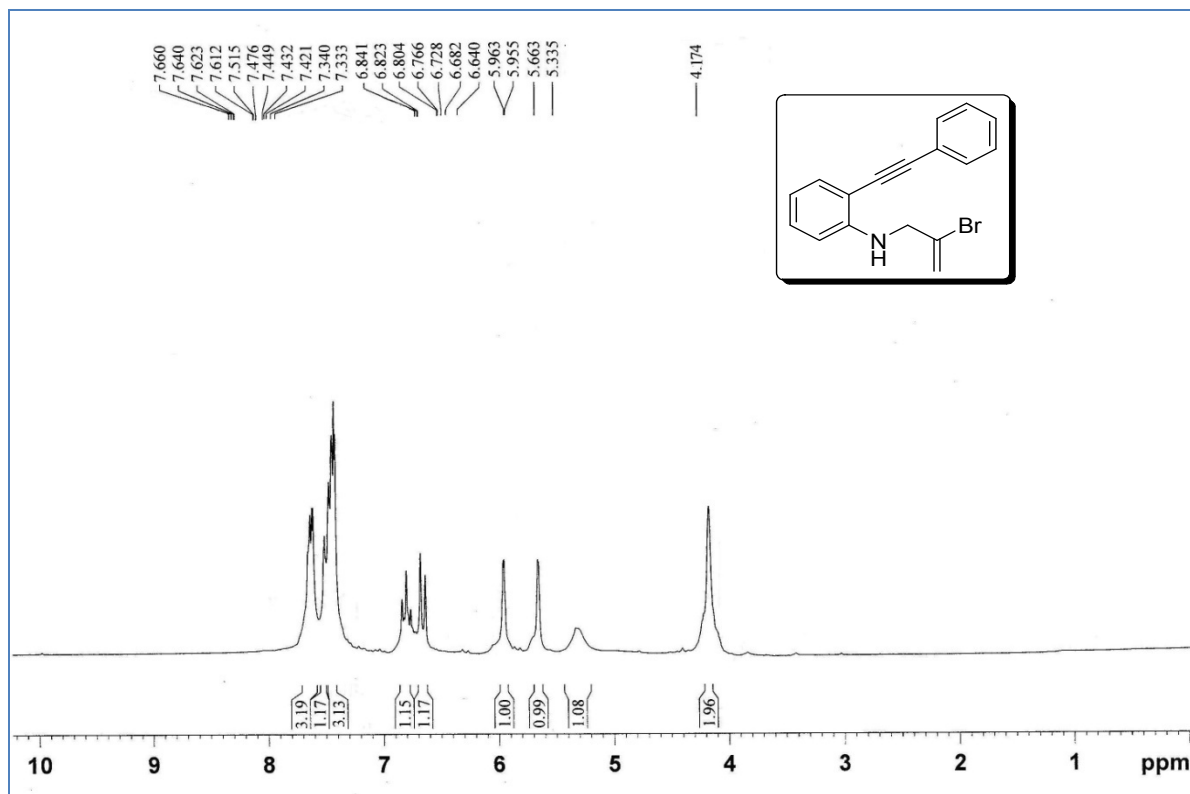

**<sup>13</sup>C NMR (CDCl<sub>3</sub>, 50 MHz) Spectrum of (2a):**

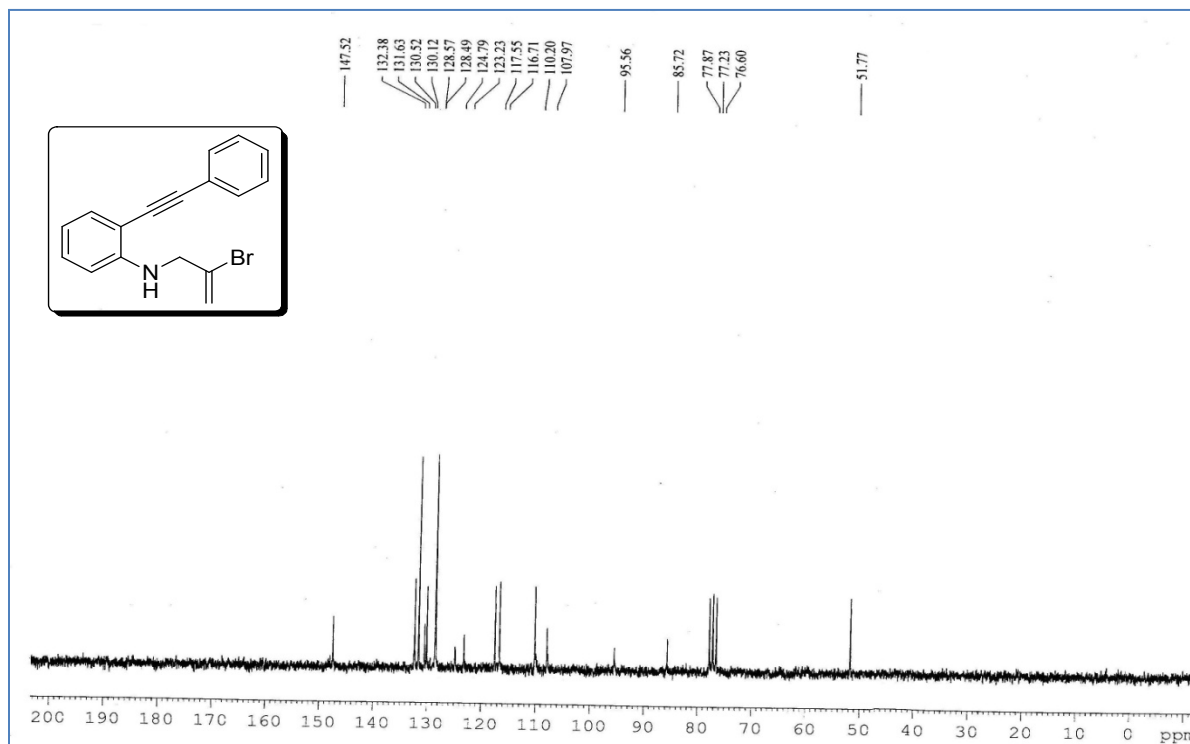



**<sup>1</sup>H NMR (CDCl<sub>3</sub>, 200 MHz) Spectrum of (2b):**

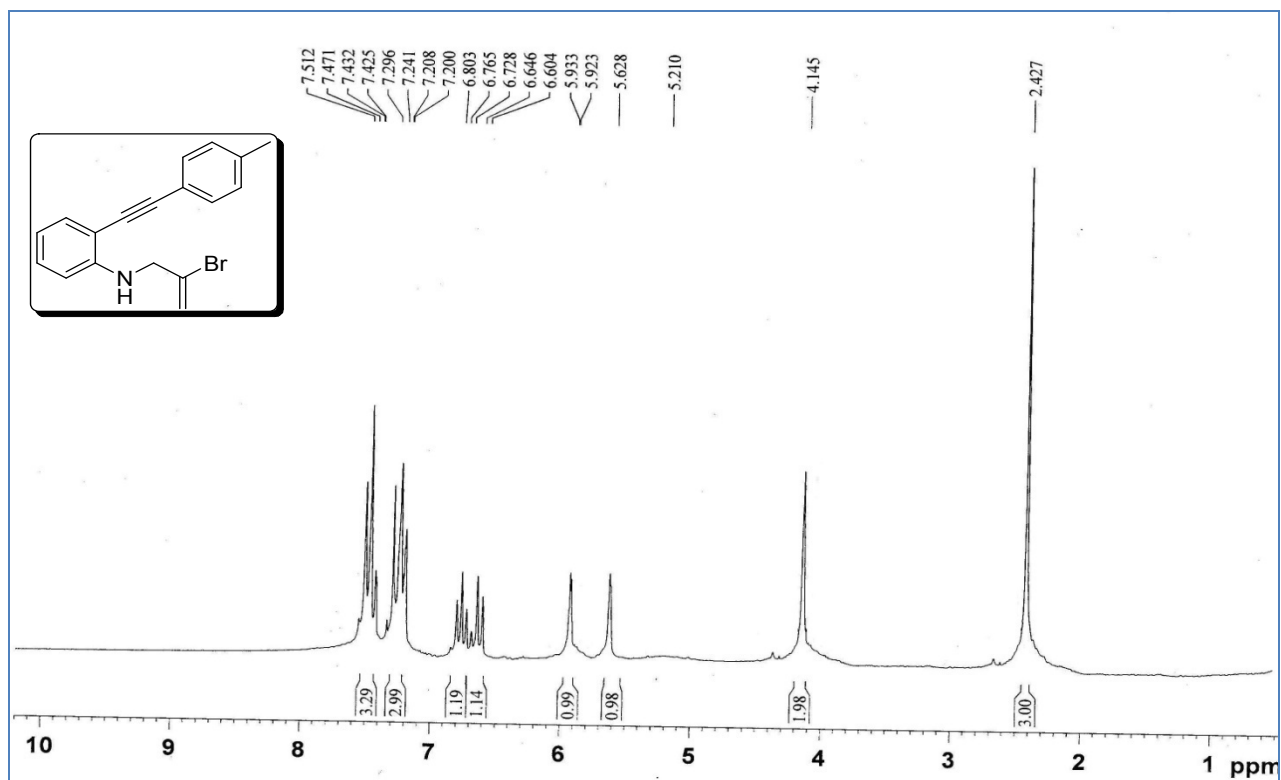

**<sup>13</sup>C NMR (CDCl<sub>3</sub>, 50 MHz) Spectrum of (2b):**

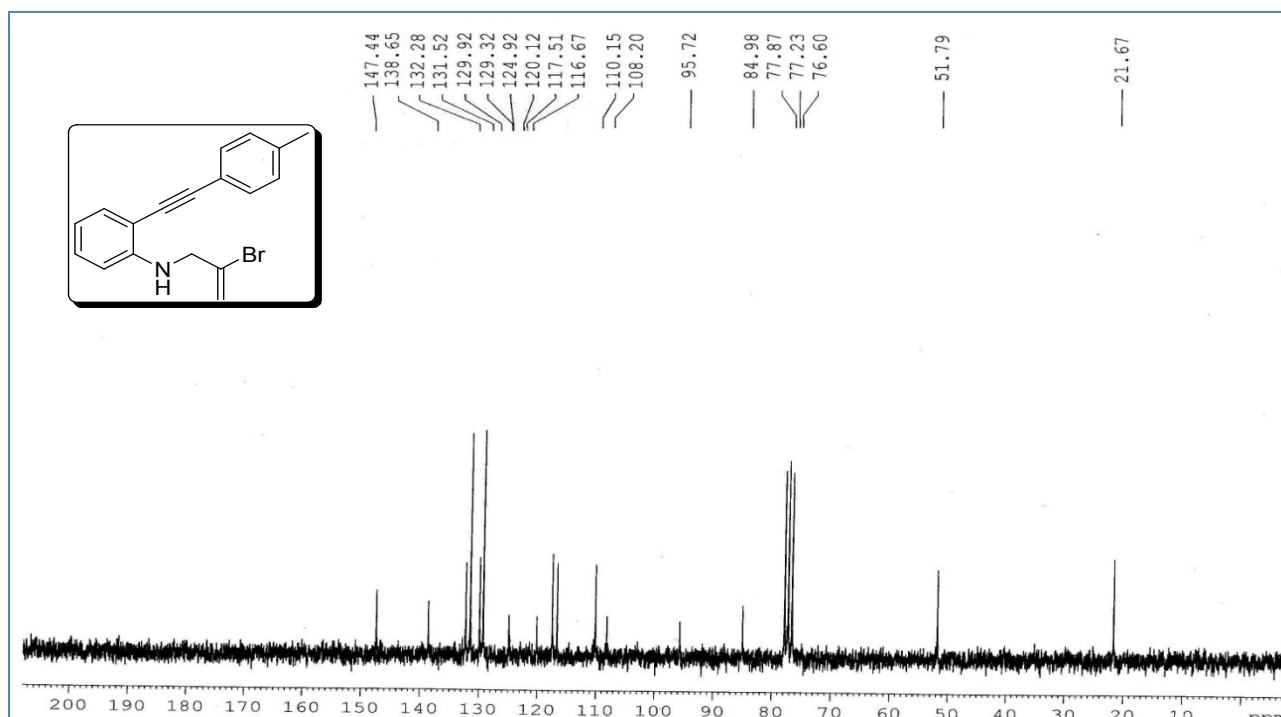

**<sup>1</sup>H NMR (CDCl<sub>3</sub>, 200 MHz) Spectrum of (2c):**

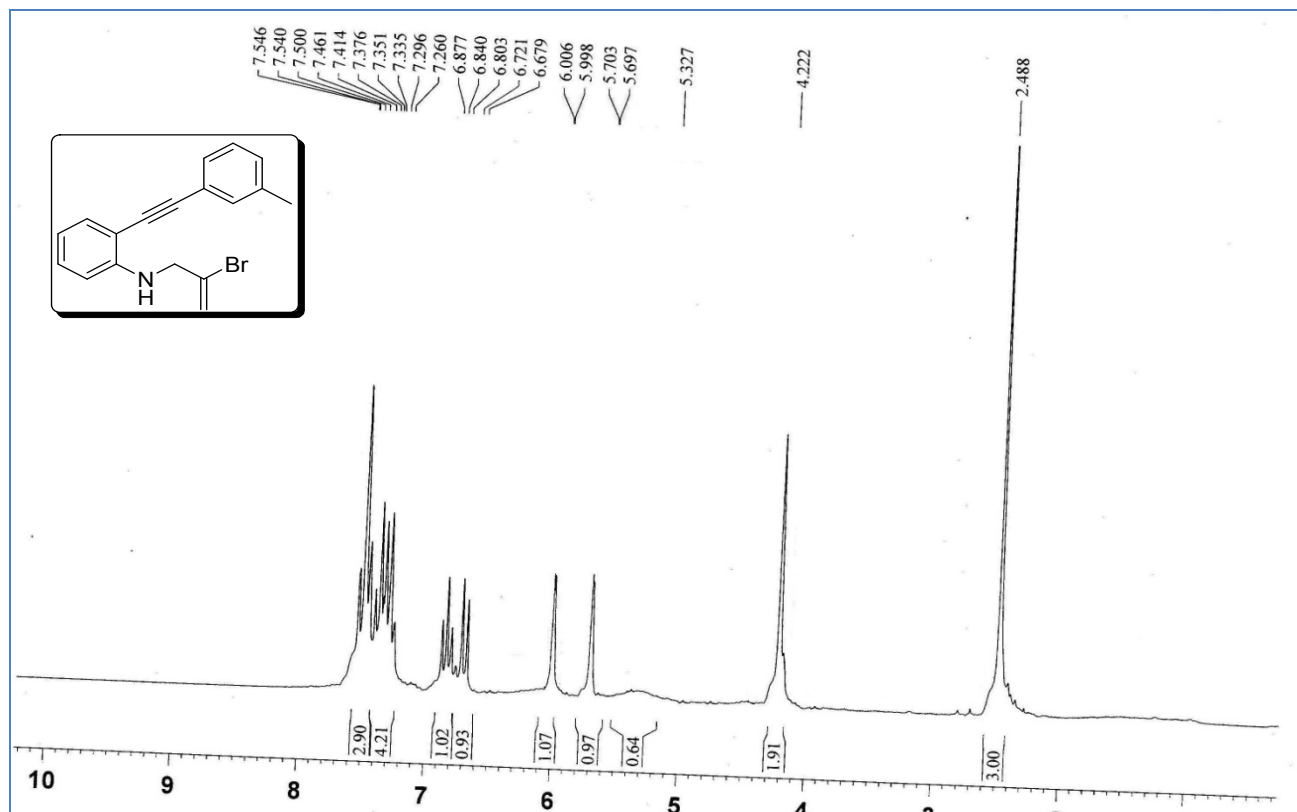

**<sup>13</sup>C NMR (CDCl<sub>3</sub>, 50 MHz) Spectrum of (2c):**

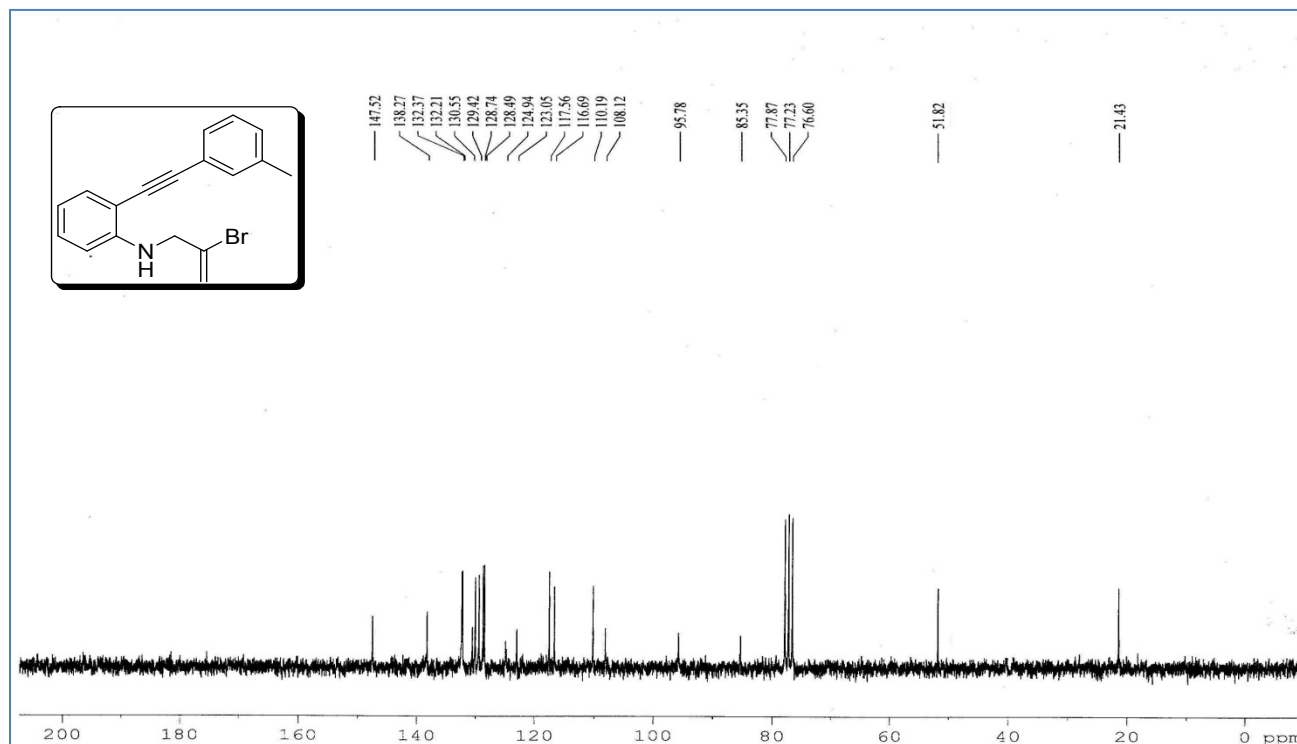

**<sup>1</sup>H NMR (CDCl<sub>3</sub>, 200 MHz) Spectrum of (2d):**

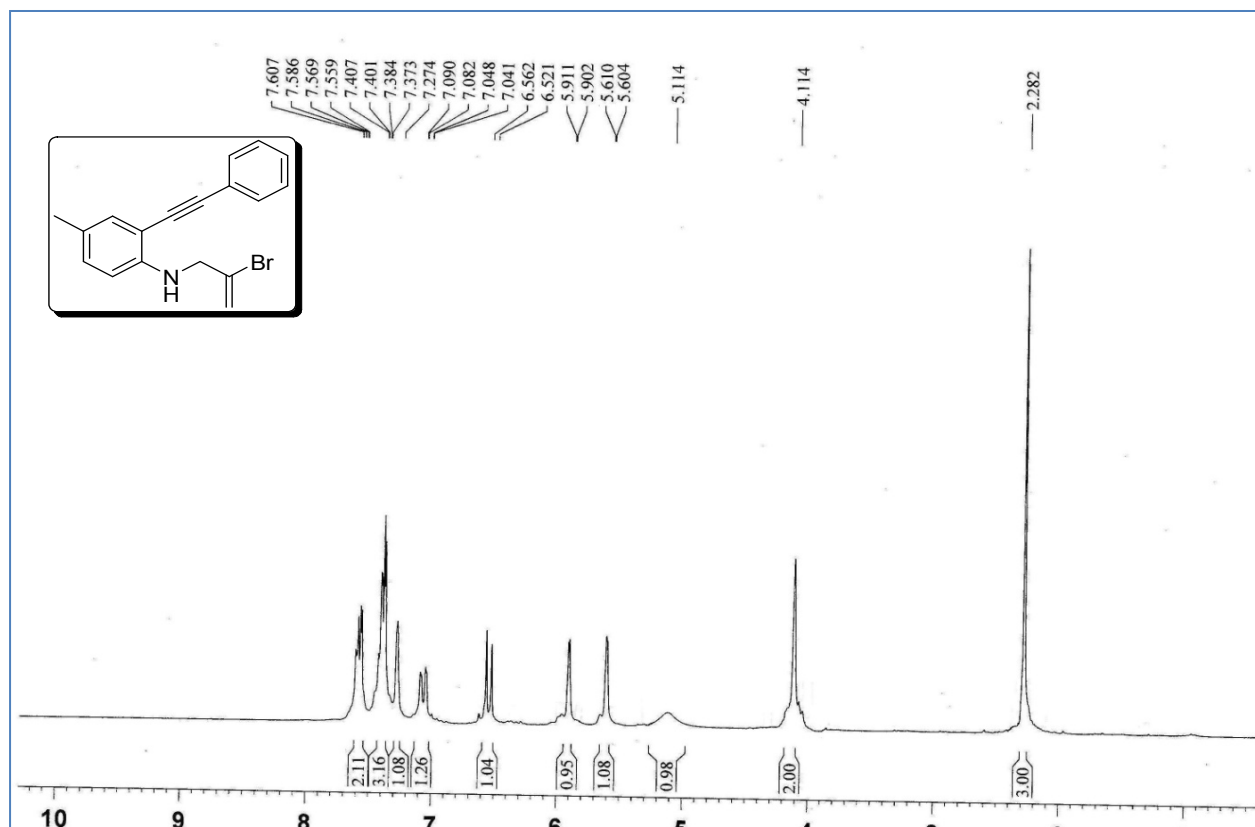

**<sup>13</sup>C NMR (CDCl<sub>3</sub>, 50 MHz) Spectrum of (2d):**

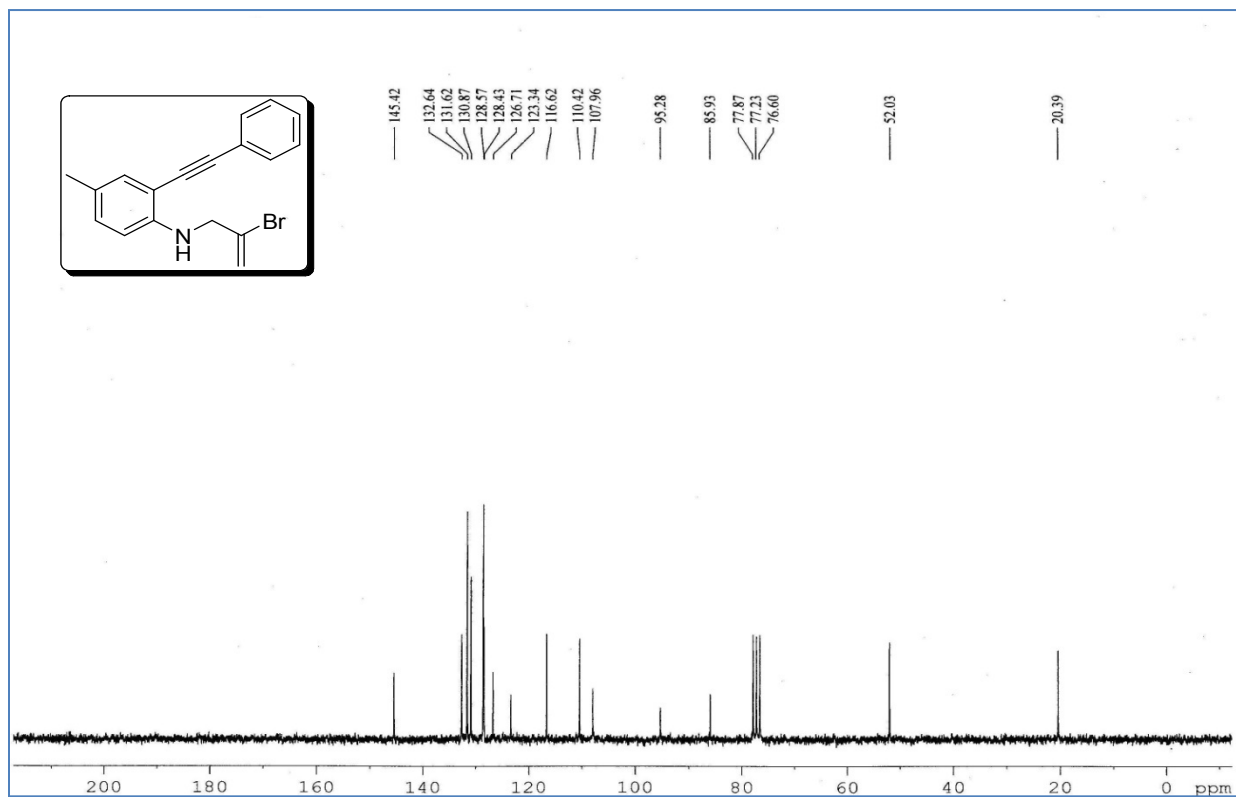

**<sup>1</sup>H NMR (CDCl<sub>3</sub>, 200 MHz) Spectrum of (2e):**

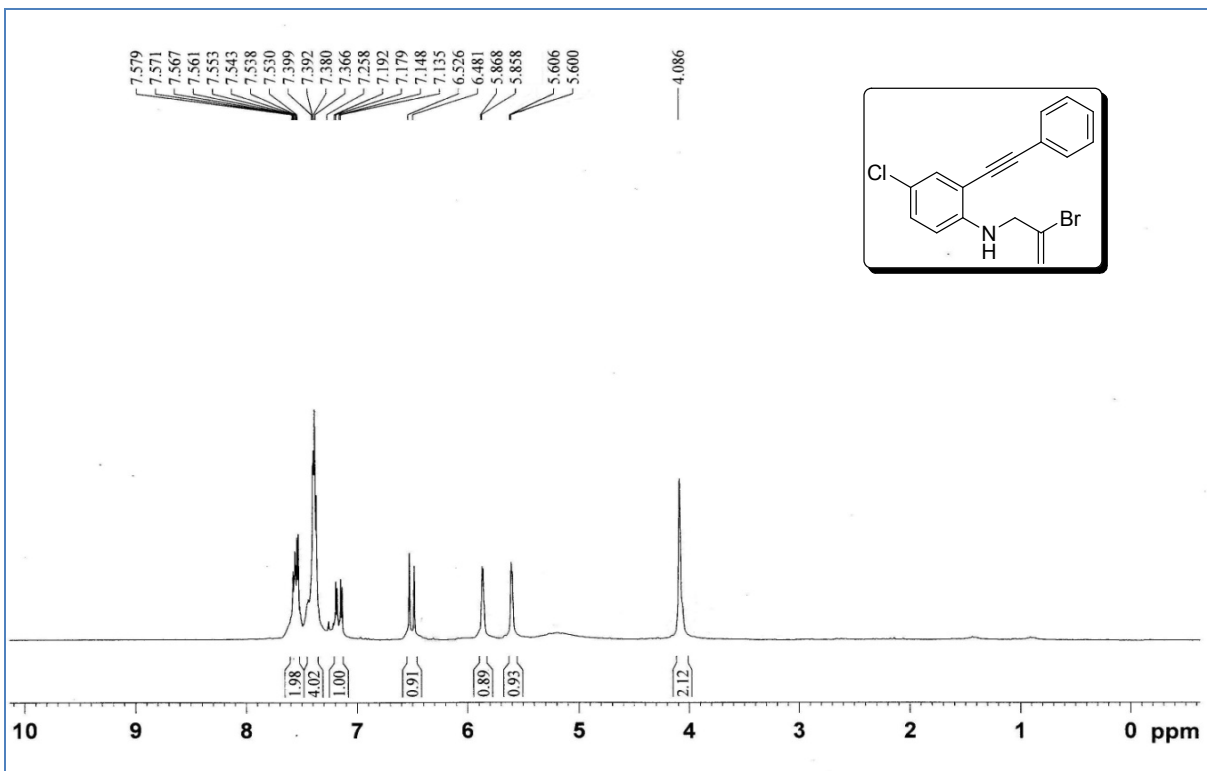

**<sup>13</sup>C NMR (CDCl<sub>3</sub>, 50 MHz) Spectrum of (2e):**

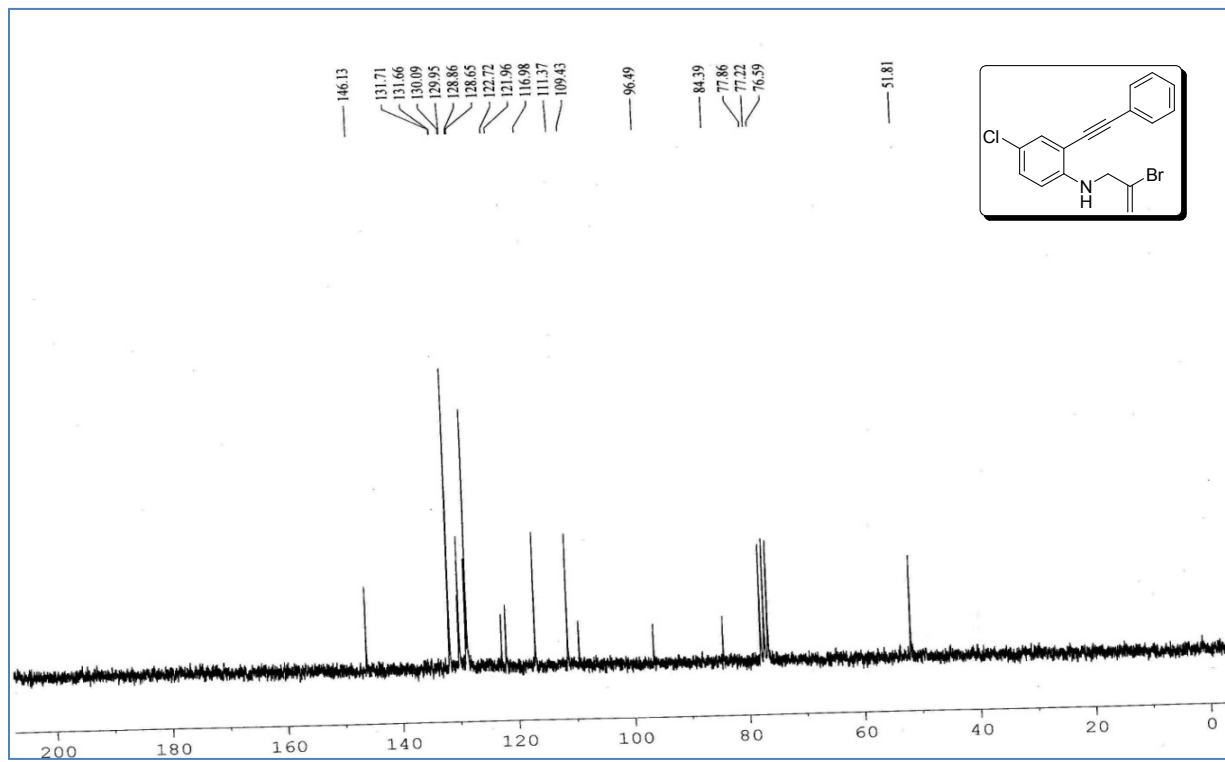

**<sup>1</sup>H NMR (CDCl<sub>3</sub>, 200 MHz) Spectrum of (2f):**

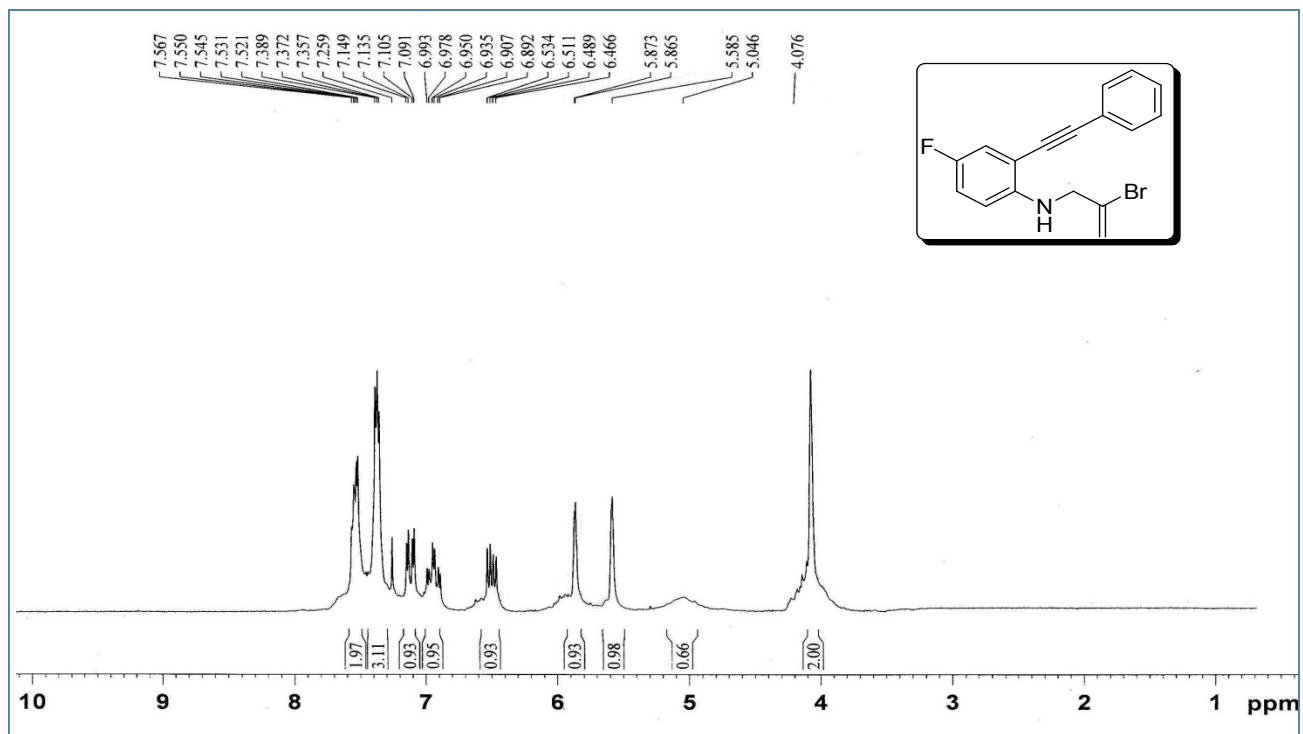

**<sup>13</sup>C NMR (CDCl<sub>3</sub>, 50 MHz) Spectrum of (2f):**

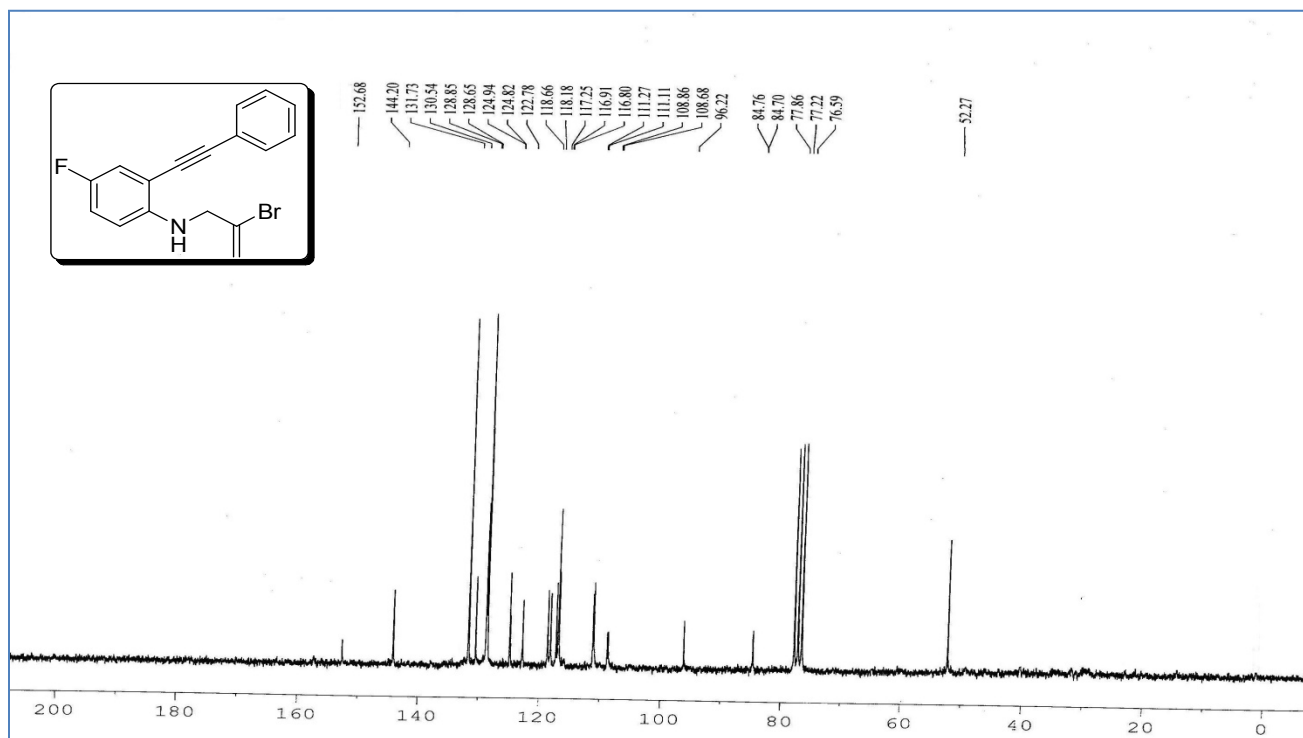

**<sup>1</sup>H NMR (CDCl<sub>3</sub>, 200 MHz) Spectrum of (2g):**

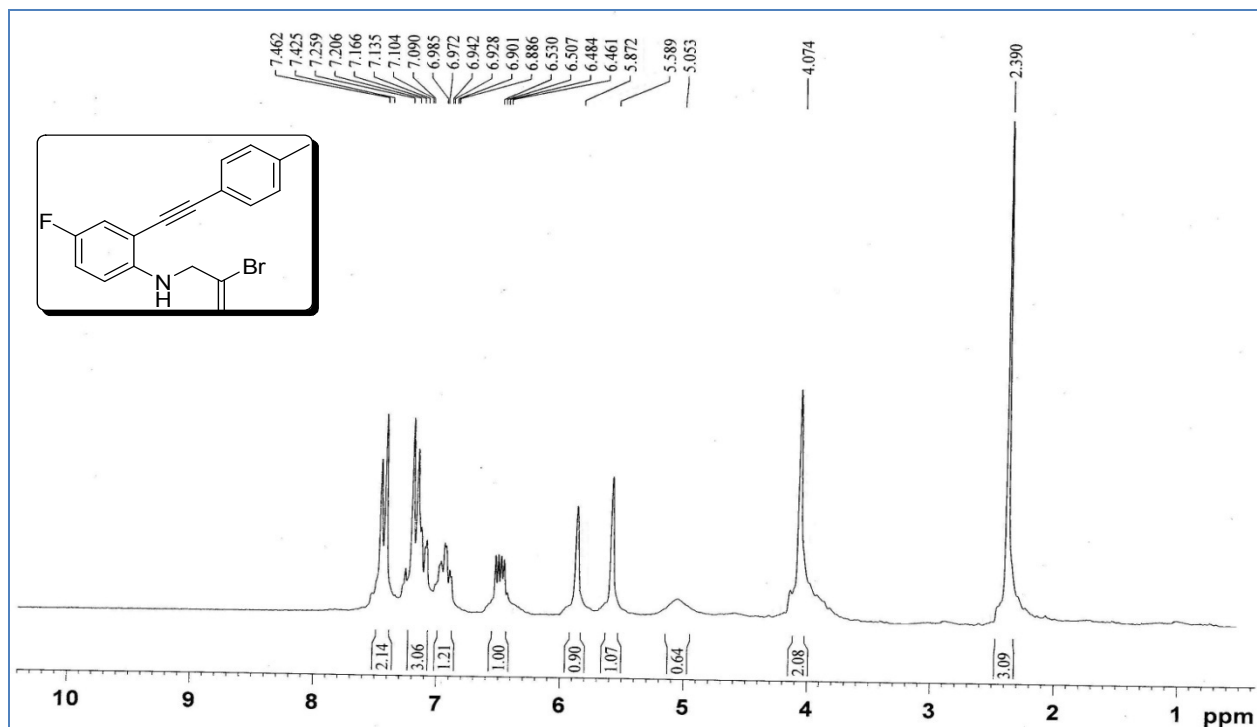

**<sup>13</sup>C NMR (CDCl<sub>3</sub>, 50 MHz) Spectrum of (2g):**

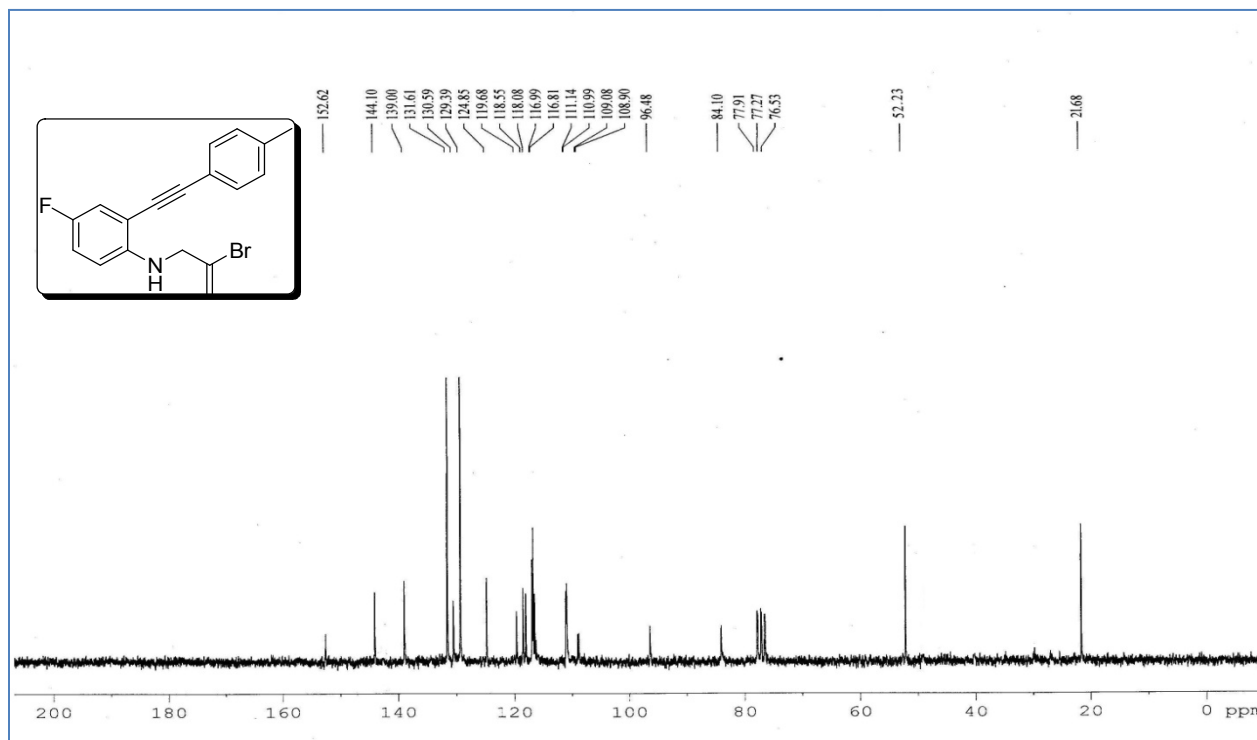

**<sup>1</sup>H NMR (CDCl<sub>3</sub>, 200 MHz) Spectrum of (2h):**

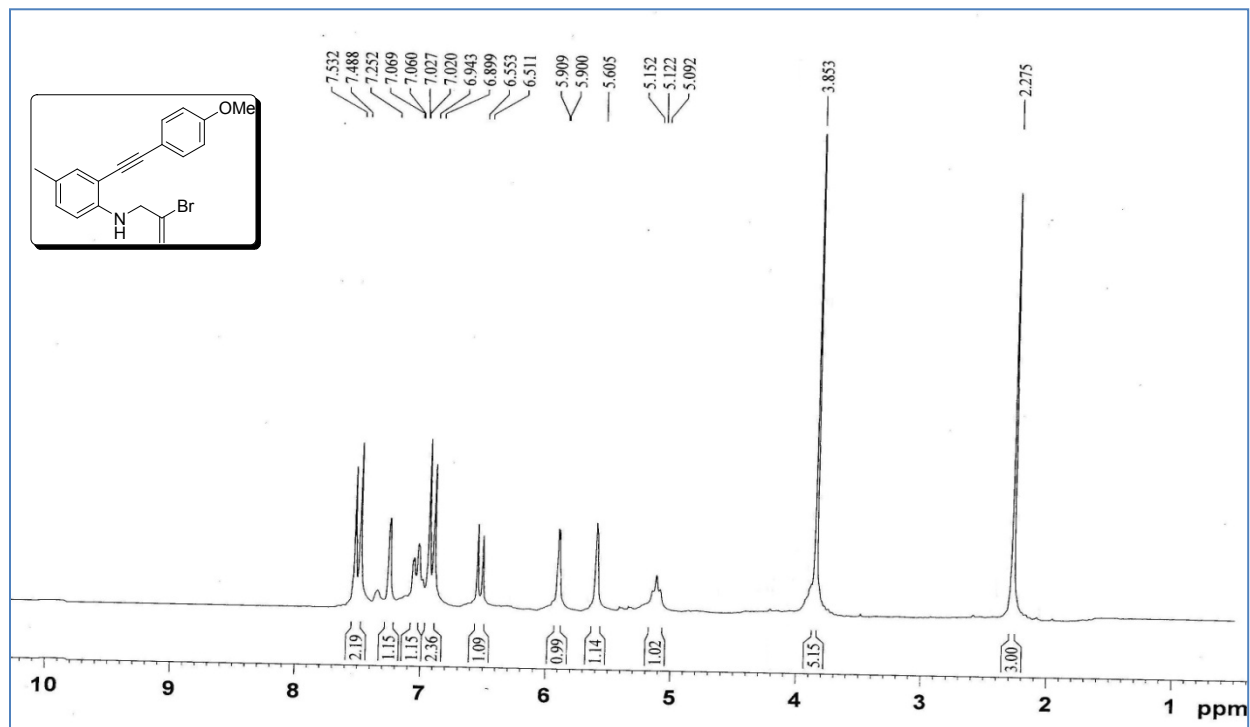

**<sup>13</sup>C NMR (CDCl<sub>3</sub>, 50 MHz) Spectrum of (2h):**

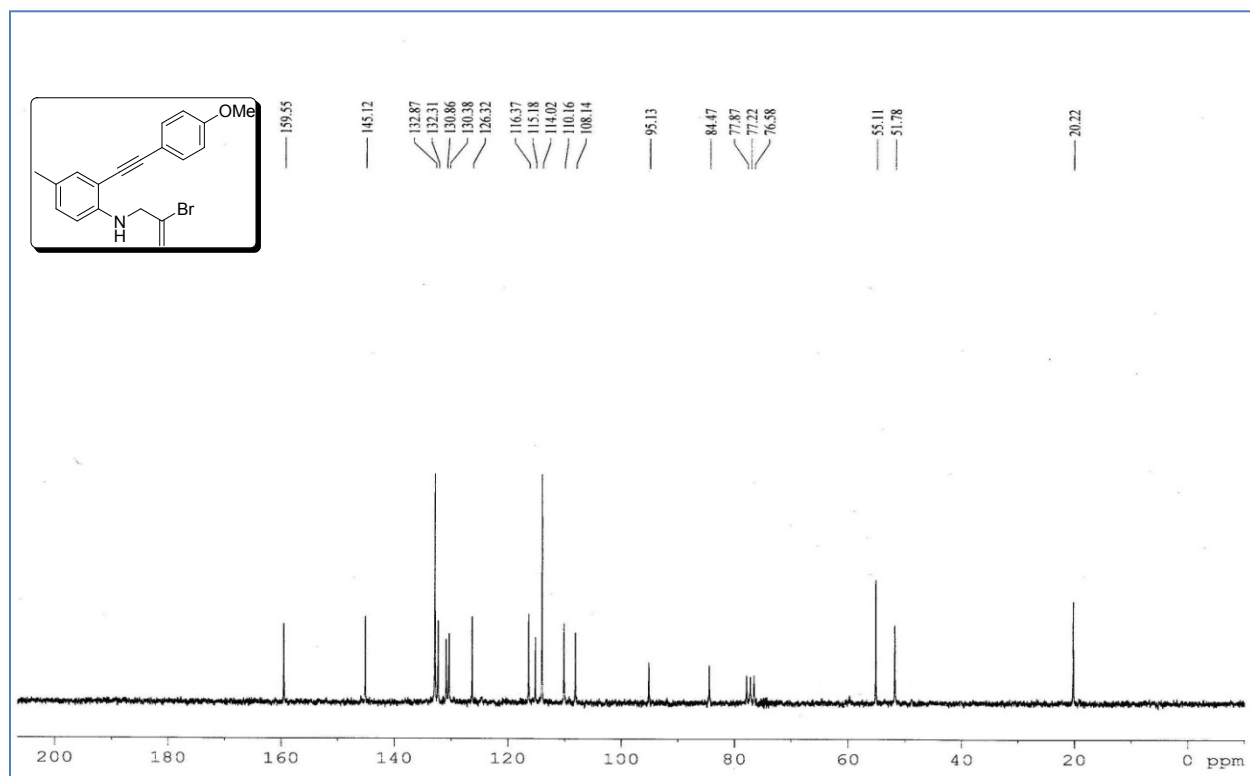

**<sup>1</sup>H NMR (CDCl<sub>3</sub>, 200 MHz) Spectrum of (2i):**

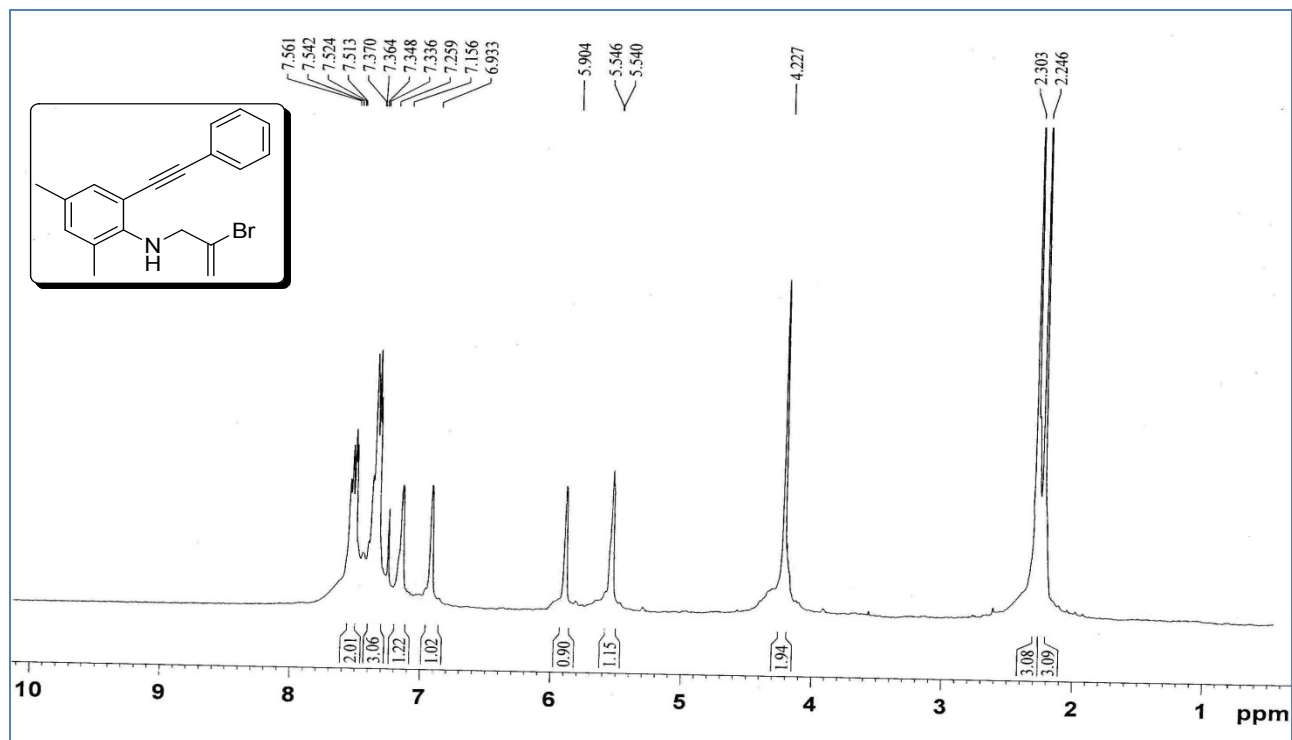

**<sup>13</sup>C NMR (CDCl<sub>3</sub>, 50 MHz) Spectrum of (2i):**

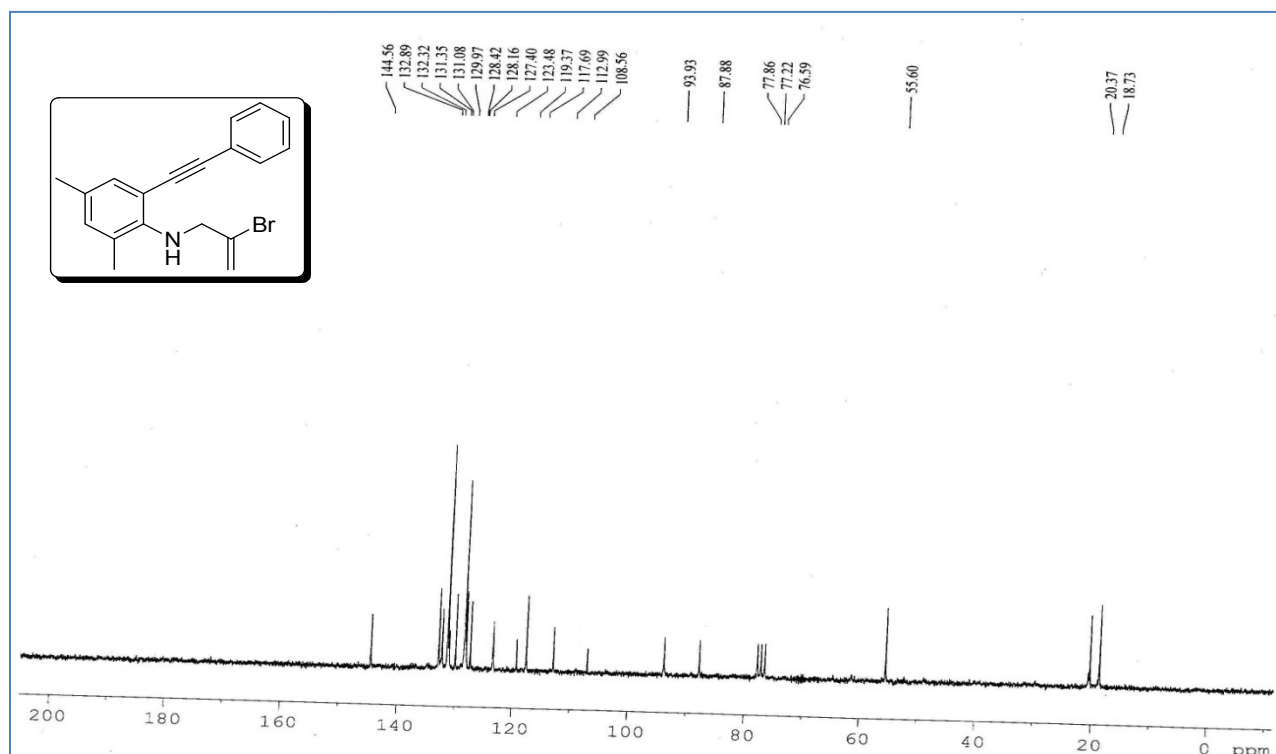



**<sup>1</sup>H NMR (CDCl<sub>3</sub>, 200 MHz) Spectrum of (2j):**

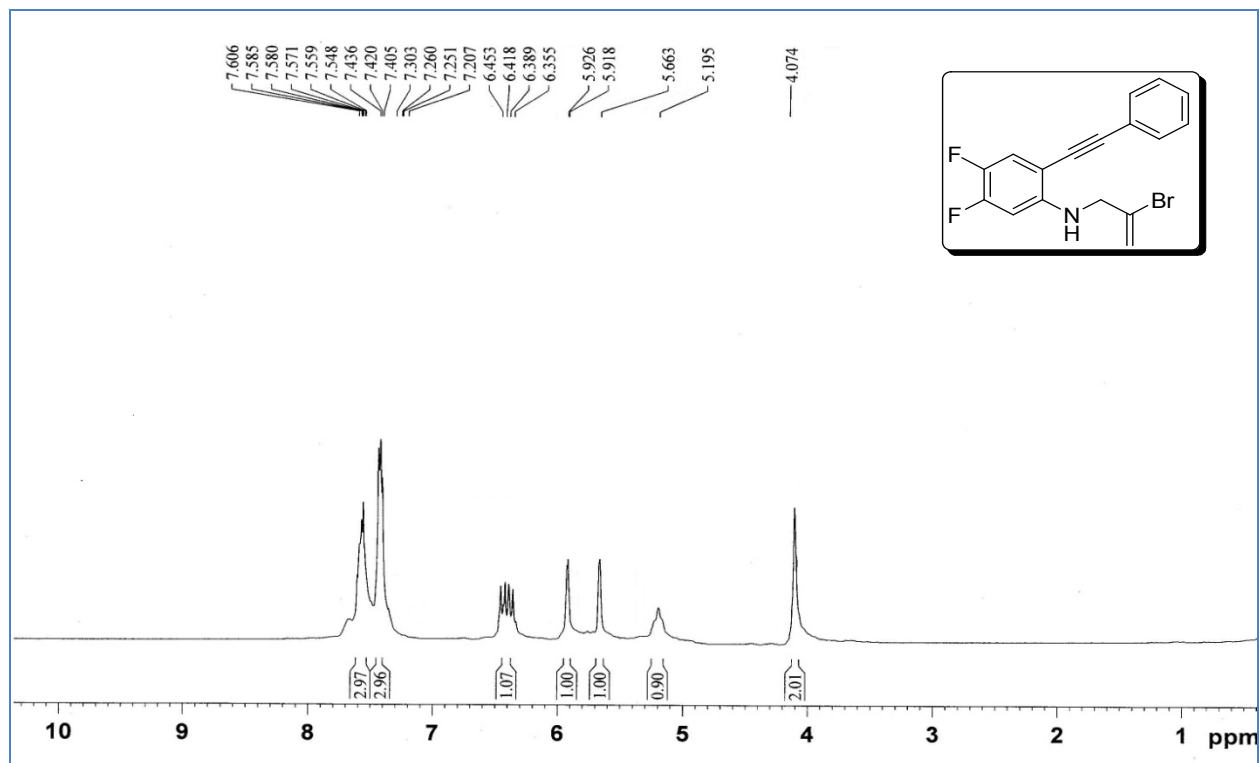

**<sup>13</sup>C NMR (CDCl<sub>3</sub>, 50 MHz) Spectrum of (2j):**

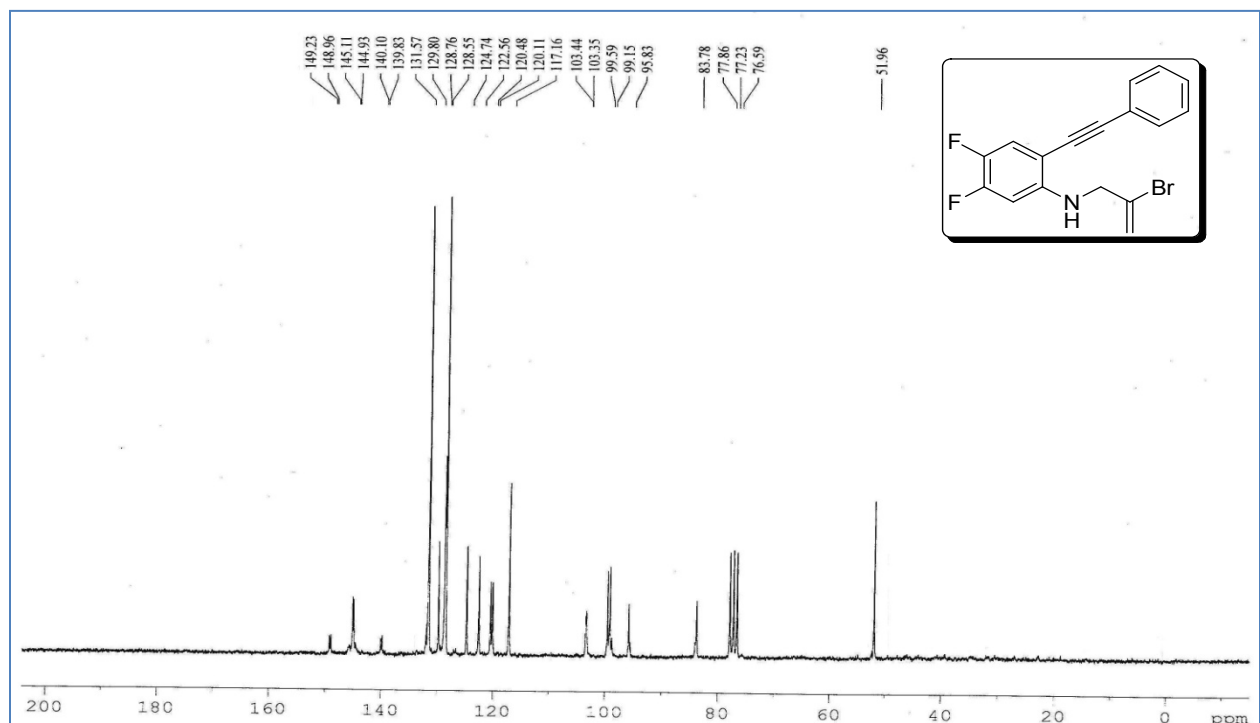

**<sup>1</sup>H NMR (CDCl<sub>3</sub>, 200 MHz) Spectrum of (2k):**

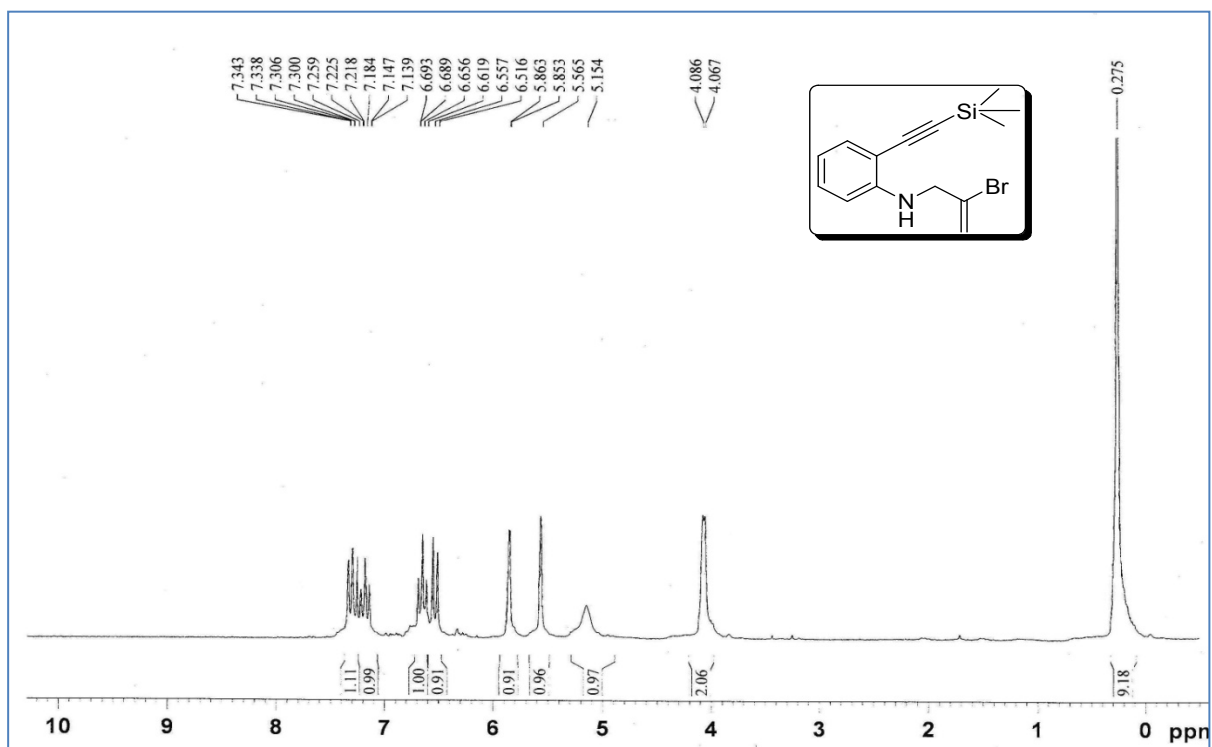

**<sup>13</sup>C NMR (CDCl<sub>3</sub>, 50 MHz) Spectrum of (2k):**

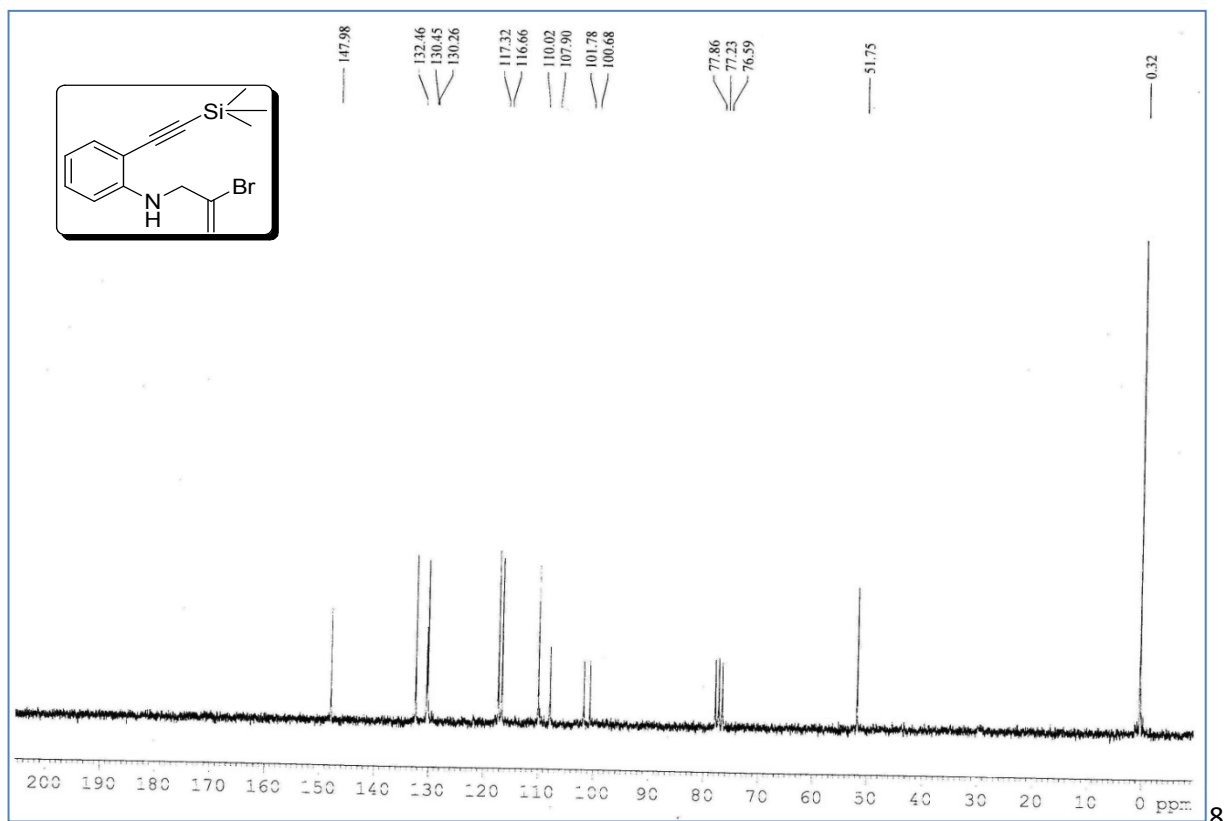

**$^1\text{H}$  NMR (CDCl<sub>3</sub>, 200 MHz) Spectrum of (2l):**

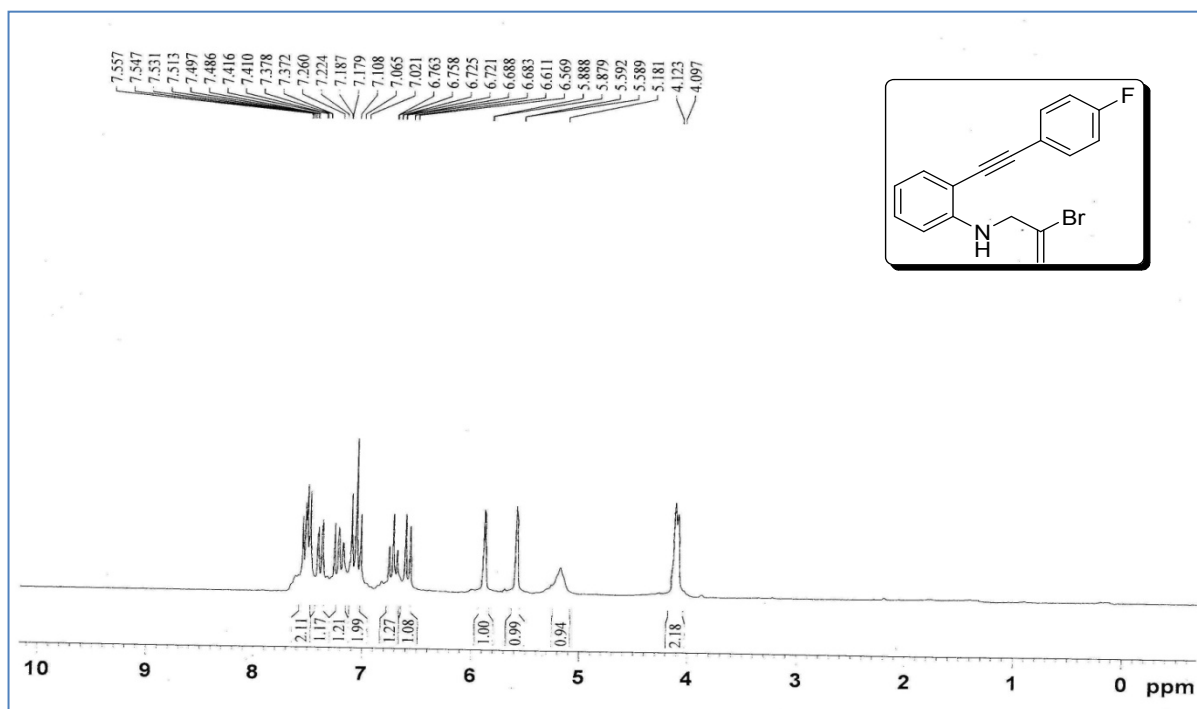

**$^{13}\text{C}$  NMR (CDCl<sub>3</sub>, 50 MHz) Spectrum of (2l):**

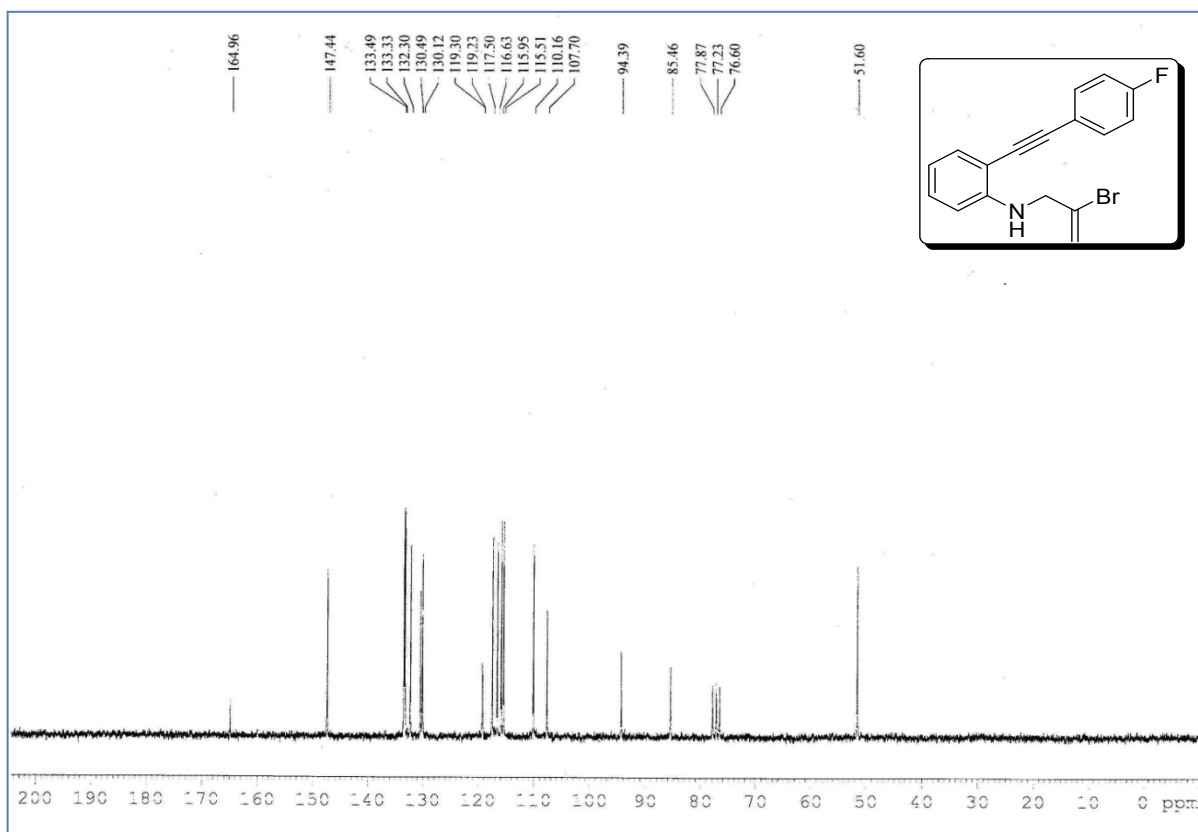

**<sup>1</sup>H NMR (CDCl<sub>3</sub>, 200 MHz) Spectrum of (2m):**

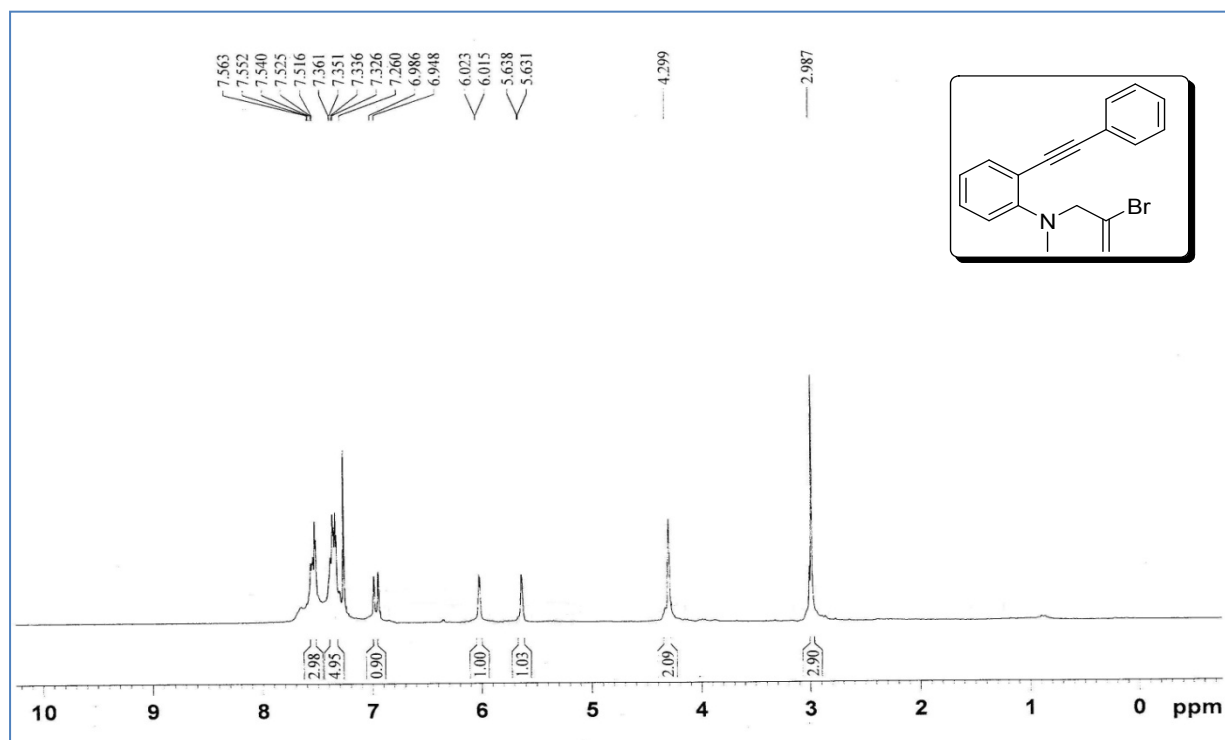

**<sup>13</sup>C NMR (CDCl<sub>3</sub>, 50 MHz) Spectrum of (2m):**

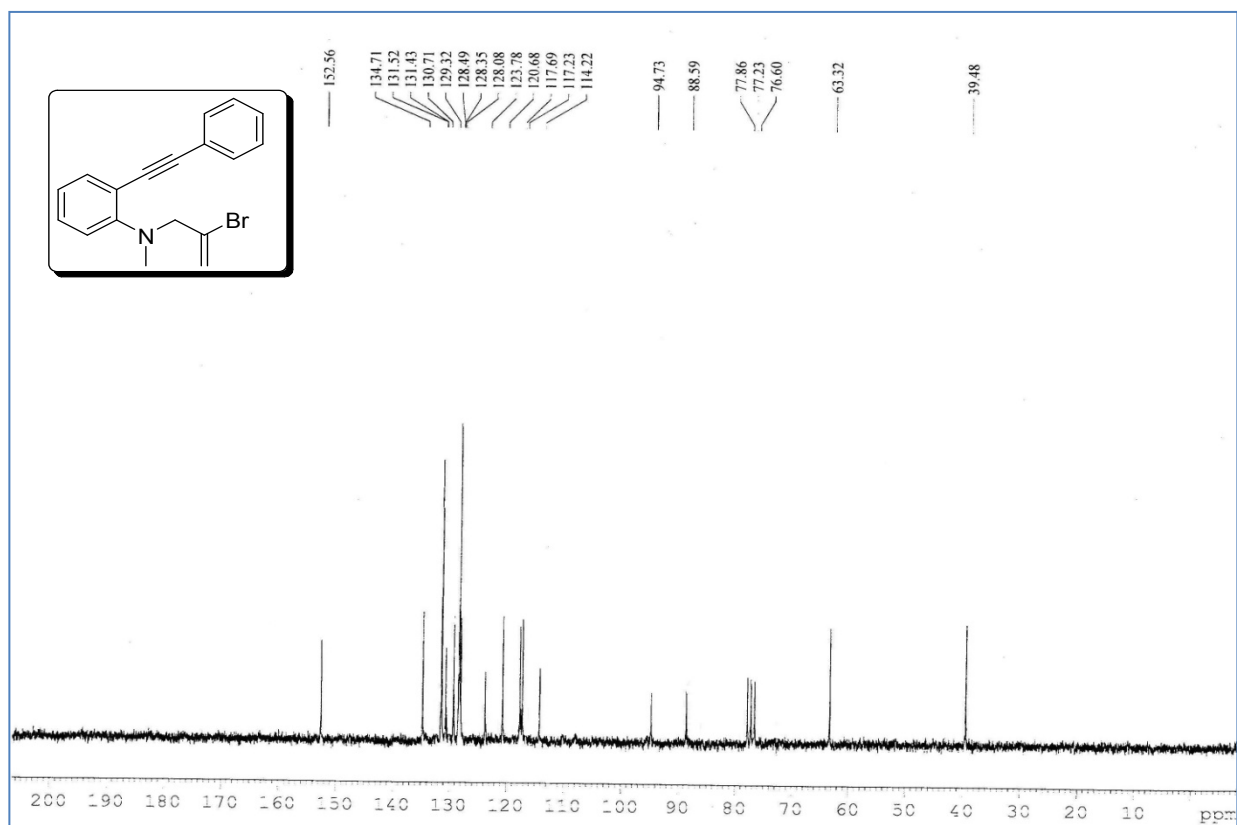

## Spectral data for compounds 3a-3m:

### 4-Benzylidene-3-methylene-1,2,3,4-tetrahydroquinoline (3a):

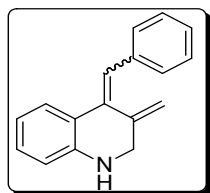

Yellow liquid, Yield = 82%,  $^1\text{H NMR}$  (200 MHz in  $\text{CDCl}_3$ ):  $\delta$  = 7.66-7.62 (m, 1H), 7.49 (d,  $J$  = 7.4 Hz, 2H), 7.37-7.26 (m, 5H), 7.10-7.06 (m, 1H), 6.78 (t,  $J$  = 7.2 Hz, 1H), 6.66-6.59 (m, 1H), 5.18 (s, 1H), 5.10 (s, 1H), 4.04 (s, 2H), 3.81 (br, 1H).  $^{13}\text{C NMR}$  (50 MHz in  $\text{CDCl}_3$ ):  $\delta$  = 144.7, 138.2, 134.7, 131.7, 129.0 (2C), 128.9, 128.5, 128.3 (2C), 126.7, 123.8, 121.8, 118.4, 116.3, 115.6, 50.0. Anal. Calcd. for  $\text{C}_{17}\text{H}_{15}\text{N}$ : C : 87.52, H : 6.48, N : 6.00 %; Found : C : 87.39, H : 6.51, N : 5.91 %. HRMS Calcd. for  $\text{C}_{17}\text{H}_{16}\text{N}^+$   $[\text{M} + \text{H}]^+$ : 234.1277; Found: 234.1318.

### 4-(4-Methyl-benzylidene)-3-methylene-1,2,3,4-tetrahydroquinoline (3b):

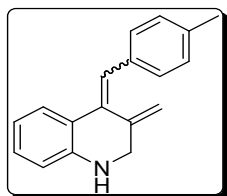

Yellow liquid, Yield = 80%,  $^1\text{H NMR}$  (200 MHz in  $\text{CDCl}_3$ ):  $\delta$  = 7.49-7.37 (m, 3H), 7.26-7.09 (m, 5H), 6.78-6.74 (m, 2H), 5.18 (s, 1H), 5.13 (s, 1H), 4.03 (s, 2H), 3.70 (br, 1H), 2.37 (s, 3H).  $^{13}\text{C NMR}$  (50 MHz in  $\text{CDCl}_3$ ):  $\delta$  = 147.9, 144.5, 138.5, 132.2, 131.5 (2C), 130.0, 129.7 (2C), 129.3, 129.0, 128.9, 123.7, 120.4, 118.1, 114.5, 49.9, 21.7. Anal. Calcd. for  $\text{C}_{18}\text{H}_{17}\text{N}$ : C : 87.41, H : 6.93, N : 5.66 %; Found : C : 87.33, H : 6.99, N : 5.55 %. HRMS Calcd. for  $\text{C}_{18}\text{H}_{18}\text{N}^+$   $[\text{M} + \text{H}]^+$ : 248.1434; Found : 248.1449.

### 4-(3-Methyl-benzylidene)-3-methylene-1,2,3,4-tetrahydroquinoline (3c):

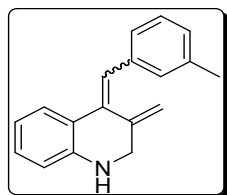

Yellow liquid, Yield = 72%,  $^1\text{H NMR}$  (200 MHz in  $\text{CDCl}_3$ ):  $\delta$  = 7.64 (d,  $J$  = 7.8 Hz, 1H), 7.30-7.00 (m, 6H), 6.87-6.75 (m, 2H), 6.62 (d,  $J$  = 8.0 Hz, 1H), 5.19 (s, 1H), 5.13 (s, 1H), 4.04 (s, 2H), 3.07 (br, 1H), 2.38 (s, 3H).  $^{13}\text{C NMR}$  (50 MHz in  $\text{CDCl}_3$ ):  $\delta$  = 144.6, 138.2, 137.8, 135.6, 129.7, 129.2, 128.8, 128.1, 127.7, 127.4, 126.0, 123.8, 122.0, 118.4, 116.3, 115.6, 50.0, 21.6. Anal. Calcd. for  $\text{C}_{18}\text{H}_{17}\text{N}$ : C : 87.41, H : 6.93, N : 5.66 %; Found : C : 87.36, H : 6.94, N : 5.57 %. HRMS Calcd. for  $\text{C}_{18}\text{H}_{18}\text{N}^+$   $[\text{M} + \text{H}]^+$ : 248.1434; Found : 28.1453.

### 4-Benzylidene-6-methyl-3-methylene-1,2,3,4-tetrahydroquinoline (3d):

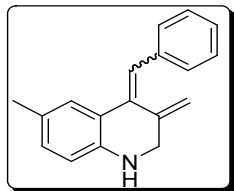

Yellow liquid, Yield = 76%,  $^1\text{H NMR}$  (200 MHz in  $\text{CDCl}_3$ ):  $\delta$  = 7.49 (d,  $J$  = 7.8 Hz, 3H), 7.40-7.26 (m, 4H), 7.02-6.91 (m, 2H), 6.55 (d,  $J$  = 8.2 Hz, 1H),

5.17 (s, 1H), 5.09 (s, 1H), 4.00 (s, 2H), 2.33 (s, 3H).  $^{13}\text{C}$  NMR (50 MHz in  $\text{CDCl}_3$ ):  $\delta = 142.5$ , 138.5, 138.3, 134.7, 131.6, 129.8, 129.6, 129.0, 128.3 (2C), 127.6, 126.6, 123.9, 121.5, 116.3, 115.8, 50.1, 20.9. Anal. Calcd. for  $\text{C}_{18}\text{H}_{17}\text{N}$ : C : 87.41, H : 6.93, N : 5.66 %; Found : C : 87.28, H : 6.91, N : 5.60 %. HRMS Calcd. for  $\text{C}_{18}\text{H}_{18}\text{N}^+$   $[\text{M}+\text{H}]^+$  : 248.1434; Found : 248.1450.

#### 4-Benzylidene-6-chloro-3-methylene-1,2,3,4-tetrahydroquinoline (3e):

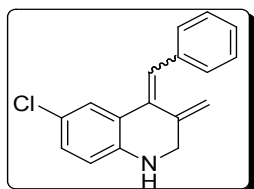

Yellow liquid, Yield = 74%,  $^1\text{H}$  NMR (200 MHz in  $\text{CDCl}_3$ ):  $\delta = 7.54$ -7.51 (m, 1H), 7.44 (d,  $J = 7.8$  Hz, 2H), 7.37-7.22 (m, 4H), 7.07-6.93 (m, 2H), 6.48 (dd,  $J_1 = 1.4$  Hz,  $J_2 = 8.6$  Hz, 1H), 5.15 (s, 1H), 5.07 (s, 1H), 4.25 (br, 1H), 3.98 (s, 2H).  $^{13}\text{C}$  NMR (50 MHz in  $\text{CDCl}_3$ ):  $\delta = 143.1$ , 137.7, 137.3, 133.6, 131.7, 129.0 (2C), 128.6 (2C), 128.4 (2C), 126.9, 123.5, 122.8, 116.8, 116.6, 49.7. Anal. Calcd. for  $\text{C}_{17}\text{H}_{14}\text{ClN}$ : C: 76.26, H : 5.27, N : 5.23 %; Found : C : 76.23, H : 5.29, N : 5.16 %. HRMS Calcd. for  $\text{C}_{17}\text{H}_{15}\text{ClN}^+$   $[\text{M}+\text{H}]^+$  : 268.0888; Found : 268.0882.

#### 4-Benzylidene-6-fluoro-3-methylene-1,2,3,4-tetrahydroquinoline (3f):

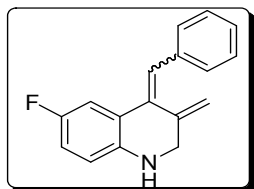

Yellow liquid, Yield = 64%,  $^1\text{H}$  NMR (200 MHz in  $\text{CDCl}_3$ ):  $\delta = 7.44$  (d,  $J = 7.4$  Hz, 2H), 7.33-7.26 (m, 5H), 6.93 (s, 1H), 6.84-6.75 (m, 1H), 6.52 (dd,  $J_1 = 5.0$  Hz,  $J_2 = 8.8$  Hz, 1H), 5.16 (s, 1H), 5.07 (s, 1H), 3.96 (s, 2H), 3.11 (br, 1H).  $^{13}\text{C}$  NMR (50 MHz in  $\text{CDCl}_3$ ):  $\delta = 152.7$ , 144.2, 139.0, 131.7 (2C), 130.5, 128.7 ( $J = 10.0$  Hz) (3C), 124.9 ( $J = 6.0$  Hz), 122.8, 118.4 ( $J = 24.0$  Hz), 117.2, 116.8 ( $J = 5.5$  Hz) (2C), 111.2 ( $J = 8.0$  Hz), 49.3. Anal. Calcd. for  $\text{C}_{17}\text{H}_{14}\text{FN}$ : C : 81.25, H : 5.62, N : 5.57 %; Found : C : 81.17, H : 5.66, N : 5.49 %. HRMS Calcd. for  $\text{C}_{17}\text{H}_{15}\text{FN}^+$   $[\text{M}+\text{H}]^+$  : 252.1183; Found : 252.1227.

#### 6-Fluoro-(4-methyl-benzylidene)-3-methylene-1,2,3,4-tetrahydroquinoline (3g):

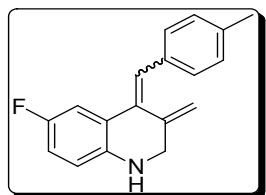

Yellow liquid, Yield = 67%,  $^1\text{H}$  NMR (200 MHz in  $\text{CDCl}_3$ ):  $\delta = 7.47$ -7.32 (m, 3H), 7.13 (d,  $J = 7.6$  Hz, 3H), 6.91 (s, 1H), 6.50 (dd,  $J_1 = 5.0$  Hz,  $J_2 = 8.8$  Hz, 1H), 5.17 (s, 1H), 5.14 (s,  $J = 1.2$  Hz, 1H), 3.94 (s, 2H), 3.72 (br, 1H), 2.36 (s, 3H).  $^{13}\text{C}$  NMR (50 MHz in  $\text{CDCl}_3$ ):  $\delta = 154.2$ , 140.9, 138.9, 137.9, 134.7, 131.6 (2C), 129.2 ( $J = 14.5$  Hz) (2C), 128.8 ( $J = 7.0$  Hz) (2C), 122.8, 117.3 ( $J = 28.0$  Hz), 116.6 ( $J = 9.0$  Hz), 115.6 ( $J = 23.0$  Hz), 109.5 ( $J = 23.0$  Hz), 49.9, 21.4. Anal. Calcd.

for  $C_{18}H_{16}FN$  : C : 81.48, H : 6.08, N : 5.28 %; Found : C : 81.37, H : 6.13, N : 5.19 %. HRMS Calcd. for  $C_{18}H_{17}FN^+$  [M+H]<sup>+</sup> : 266.1340; Found : 266.1361.

#### 4-(4-Methoxy-benzylidene)-6-methyl-3-methylene-1,2,3,4-tetrahydroquinoline (3h):

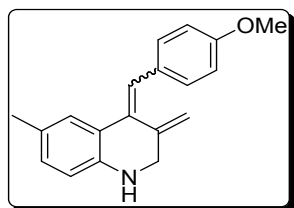

Yellow liquid, Yield = 73%, <sup>1</sup>H NMR (200 MHz in CDCl<sub>3</sub>): δ = 7.43 (d, *J* = 8.8 Hz, 2H), 6.94-6.83 (m, 5H), 6.50 (d, *J* = 8.0 Hz, 1H), 5.16 (s, 1H), 5.13 (s, 1H), 3.96 (s, 2H), 3.82 (s, 3H), 2.30 (s, 3H). <sup>13</sup>C NMR (50 MHz in CDCl<sub>3</sub>): δ = 158.4, 142.3, 138.9, 133.3, 133.0, 130.6, 130.2 (2C), 129.4, 127.4, 123.7, 122.1, 121.2, 115.8, 113.7 (2C), 55.3, 50.1, 20.9. Anal. Calcd. for  $C_{19}H_{19}NO$  : C : 82.28, H : 6.90, N : 5.05 %; Found : C : 82.17, H : 6.92, N : 4.99 %. HRMS Calcd. for  $C_{19}H_{20}NO^+$  [M+H]<sup>+</sup> : 278.1539; Found : 278.1566.

#### 4-Benzylidene-6, 8-dimethyl-3-methylene-1,2,3,4-tetrahydroquinoline (3i):

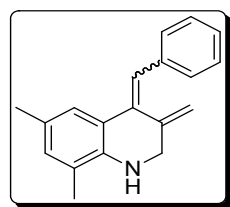

Yellow liquid, Yield = 69%, <sup>1</sup>H NMR (200 NMR in CDCl<sub>3</sub>): δ = 7.50 (d, *J* = 7.4 Hz, 2H), 7.37-7.26 (m, 5H), 7.03 (s, 1H), 6.87 (s, 1H), 5.19 (s, 1H), 5.09 (s, 1H), 4.09 (s, 2H), 2.33 (s, 3H), 2.15 (s, 3H). <sup>13</sup>C NMR (50 MHz in CDCl<sub>3</sub>): δ = 140.5, 138.7, 138.5, 135.3, 131.0, 129.0 (2C), 128.3 (2C), 127.0, 126.5, 122.7, 121.9, 121.5 (2C), 115.8, 50.2, 20.8, 17.5. Anal. Calcd. for  $C_{19}H_{19}N$  : C : 87.31, H : 7.33, N : 5.36 %; Found : C : 87.23, H : 7.35, N : 5.23 %. HRMS Calcd. for  $C_{19}H_{20}N^+$  [M+H]<sup>+</sup> : 262.1590; Found : 262.1573.

#### 4-Benzylidene-6, 7-difluoro-3-methylene-1,2,3,4-tetrahydroquinoline (3j):

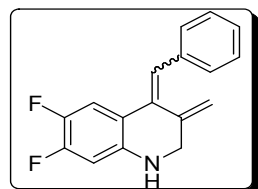

Yellow liquid; Yield = 60%, <sup>1</sup>H NMR (200 MHz in CDCl<sub>3</sub>): δ = 7.44-7.30 (m, 5H), 6.86 (s, 1H), 6.55 (dd, *J*<sub>1</sub> = 7.0 Hz, *J*<sub>2</sub> = 11.8 Hz, 1H), 6.38 (dd, *J*<sub>1</sub> = 7.0 Hz, *J*<sub>2</sub> = 11.8 Hz, 1H), 5.20 (s, 1H), 5.11 (s, 1H), 4.23 (br, 1H), 4.00 (s, 2H). <sup>13</sup>C NMR (50 MHz in CDCl<sub>3</sub>): δ = 148.2 (*J* = 14.0 Hz), 145.2 (*J* = 7.5 Hz), 137.6 (*J* = 4.5 Hz), 137.2, 131.7 (2C), 128.9 (*J* = 7.5 Hz) (2C), 128.5 (*J* = 12.5 Hz) (2C), 126.9, 122.6 (*J* = 24.0 Hz), 120.1 (*J* = 19.0 Hz), 117.0, 111.9 (*J* = 18.5 Hz), 103.2 (*J* = 5.5 Hz), 49.7. Anal. Calcd. for  $C_{17}H_{13}F_2N$  : C : 75.82, H : 4.87, N : 5.20 %; Found : 75.76, H : 4.89, N : 5.09 %. HRMS Calcd. for  $C_{17}H_{14}F_2N^+$  [M+H]<sup>+</sup> : 270.1089; Found : 270.2011.

### 3-Methylene-4-trimethylsilylmethylene-1,2,3,4-tetrahydroquinoline (3k):

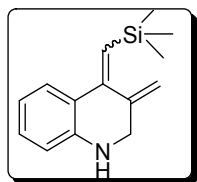

Yellow liquid, Yield = 74 %,  $^1\text{H}$  NMR (200 MHz in  $\text{CDCl}_3$ ):  $\delta$  = 7.15-6.98 (m, 2H), 6.69 (dd,  $J_1$  = 7.4 Hz,  $J_2$  = 14.8 Hz, 2H), 6.57-6.45 (m, 1H), 5.35 (d,  $J$  = 1.4 Hz, 1H), 5.29 (d,  $J$  = 0.6 Hz, 1H), 3.9 (s, 2H), 0.20 (s, 3H),  $^{13}\text{C}$  NMR (50 MHz in  $\text{CDCl}_3$ ):  $\delta$  = 149.8, 144.3, 142.0, 129.2, 124.4, 122.5, 118.2, 118.0, 115.4, 113.6, 49.3, 0.7 (3C). Anal. Calcd. for  $\text{C}_{14}\text{H}_{19}\text{NSi}$ : C : 73.30, H : 8.35, N : 6.11 %; Found : C : 73.19, H : 8.42, N : 5.98 %. HRMS Calcd. for  $\text{C}_{14}\text{H}_{20}\text{NSi}^+$  :  $[\text{M}+\text{H}]^+$  : 230.1360; Found : 230.1369.

### 4-(4-Fluoro-benzylidene)-3-methylene-1,2,3,4-tetrahydroquinoline (3l):

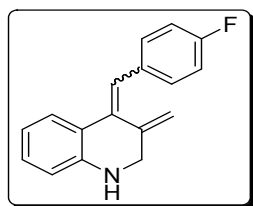

Yellow solid, Yield = 69 %, mp = 126 $^{\circ}\text{C}$ ,  $^1\text{H}$  NMR (200 MHz in  $\text{CDCl}_3$ ):  $\delta$  = 7.58-7.50 (m, 2H), 7.40 (dd,  $J_1$  = 5.6 Hz,  $J_2$  = 8.4 Hz, 2H), 7.09-6.92 (m, 3H), 6.77-6.69 (m, 1H), 6.57 (d,  $J$  = 8.0 Hz, 1H), 5.15 (d,  $J$  = 1.0 Hz, 1H), 5.03 (s, 1H), 3.99 (s, 2H),  $^{13}\text{C}$  NMR (50 MHz in  $\text{CDCl}_3$ ):  $\delta$  = 164.1, 144.6, 138.1, 134.7, 134.1 ( $J$  = 3.5 Hz), 133.5 ( $J$  = 8.0 Hz), 130.6 ( $J$  = 7.5 Hz) (2C), 128.9 (2C), 123.7, 120.5, 118.3 ( $J$  = 7.5 Hz), 116.4, 115.5 ( $J$  = 8.5 Hz) (2C), 49.9. Anal. Calcd. for  $\text{C}_{17}\text{H}_{14}\text{FN}$ : C : 81.25, H : 5.62, N : 5.57 %; Found : C : 81.14, H : 5.66, N : 5.49 %. HRMS Calcd. for  $\text{C}_{17}\text{H}_{15}\text{FN}^+$  :  $[\text{M}+\text{H}]^+$  : 252.1183; Found : 252.1195.

### 4-Benzylidene-1-methyl-3-methylene-1,2,3,4-tetrahydroquinoline (3m):

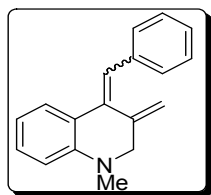

Yellow liquid, Yield = 68 %,  $^1\text{H}$  NMR (200 MHz in  $\text{CDCl}_3$ ):  $\delta$  = 7.59 (dd,  $J_1$  = 1.4 Hz,  $J_2$  = 7.8 Hz, 2H), 7.46 (d,  $J$  = 7.4 Hz, 2H), 7.30-7.19 (m, 4H), 6.91 (d,  $J$  = 8.2 Hz, 1H), 6.81-6.67 (m, 2H), 5.12 (d,  $J$  = 1.2 Hz, 1H), 5.05 (s, 1H), 3.93 (s, 2H), 2.95 (s, 3H),  $^{13}\text{C}$  NMR (50 MHz in  $\text{CDCl}_3$ ):  $\delta$  = 146.5, 138.6, 138.2, 135.4, 128.9 (2C), 128.3 (3C), 126.6, 123.7, 122.2, 117.8, 115.4, 112.4, 106.2, 58.6, 39.0. Anal. Calcd. for  $\text{C}_{18}\text{H}_{17}\text{N}$ : C : 87.41, H : 6.93, N : 5.66 %; Found : C : 87.36, H : 6.97, N : 5.52 %. HRMS Calcd. for  $\text{C}_{18}\text{H}_{18}\text{N}^+$  :  $[\text{M}+\text{H}]^+$  : 248.1434; Found : 248.1446.



**<sup>1</sup>H NMR (CDCl<sub>3</sub>, 200 MHz) Spectrum of (3a):**

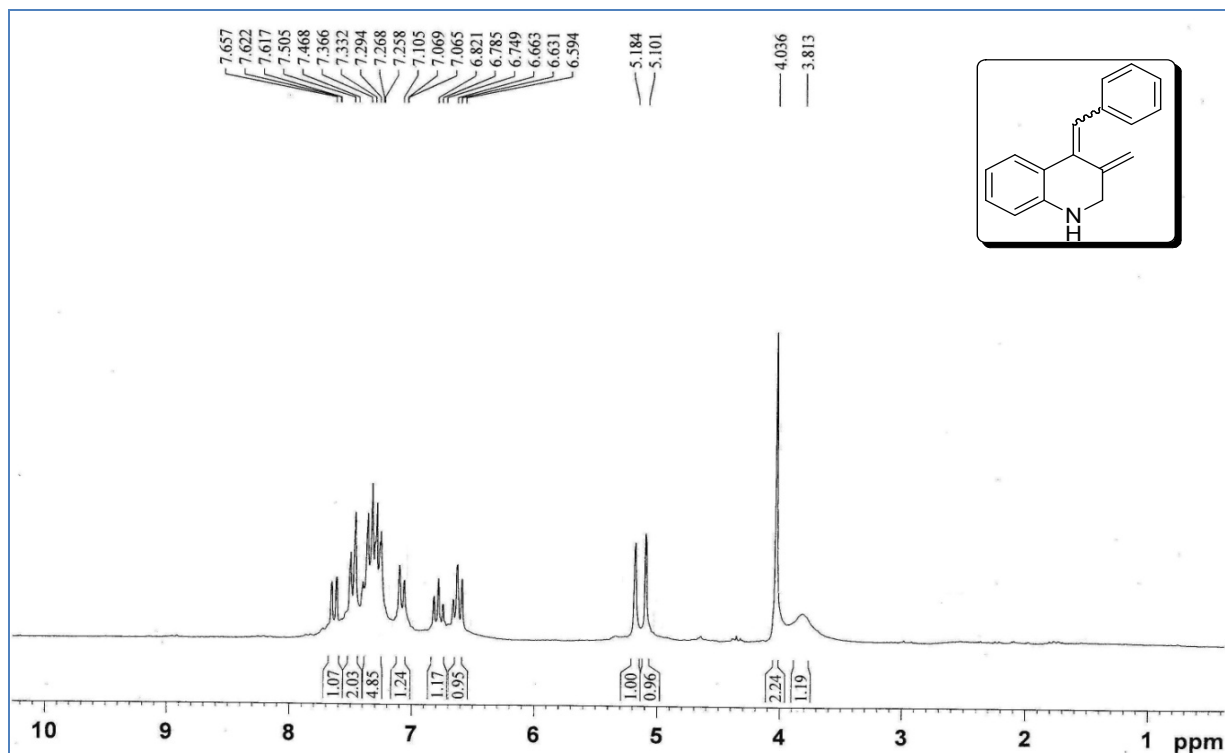

**<sup>13</sup>C NMR (CDCl<sub>3</sub>, 50 MHz) Spectrum of (3a):**

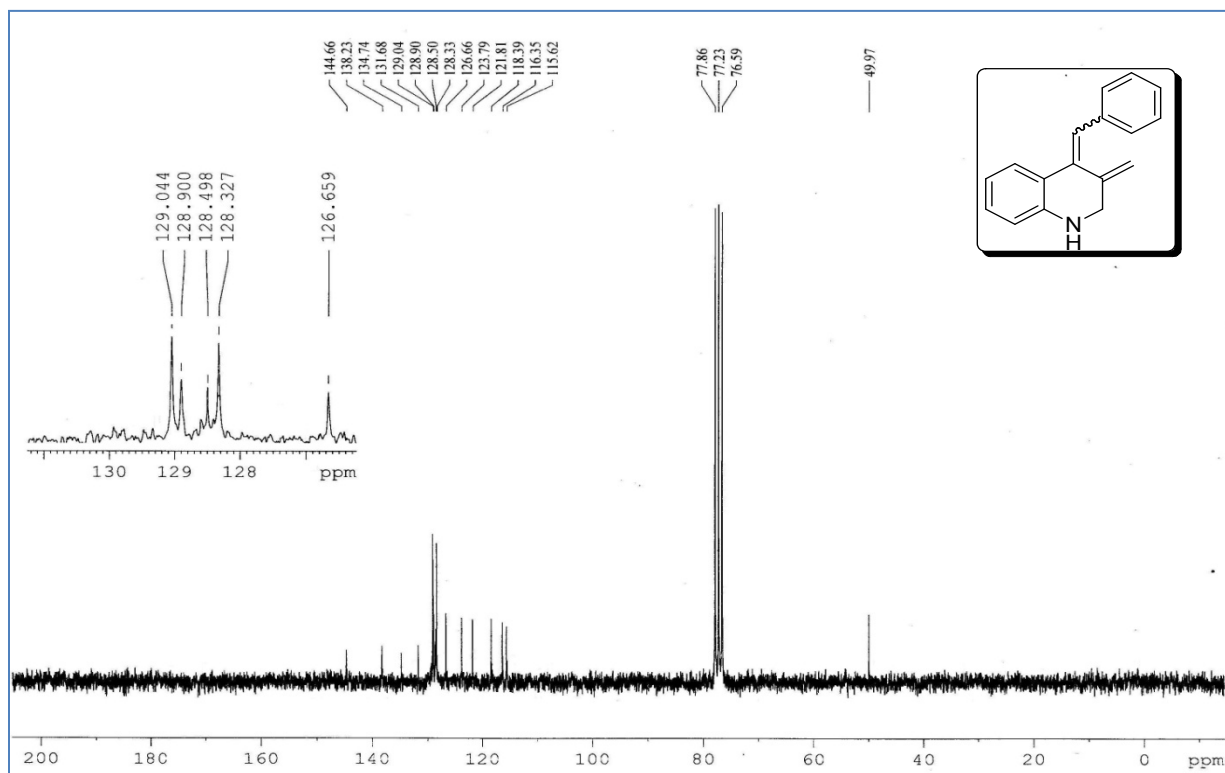

**<sup>1</sup>H NMR (CDCl<sub>3</sub>, 200 MHz) Spectrum of (3b):**

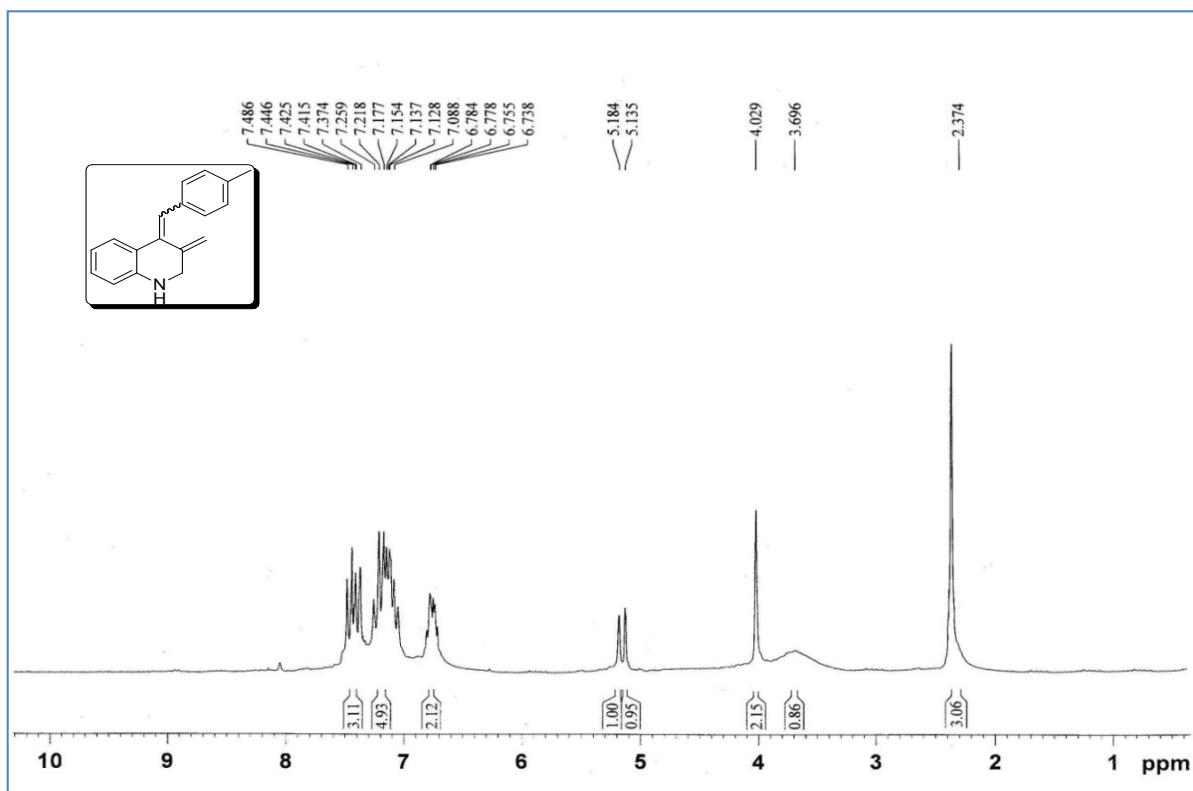

**<sup>13</sup>C NMR (CDCl<sub>3</sub>, 50 MHz) Spectrum of (3b):**

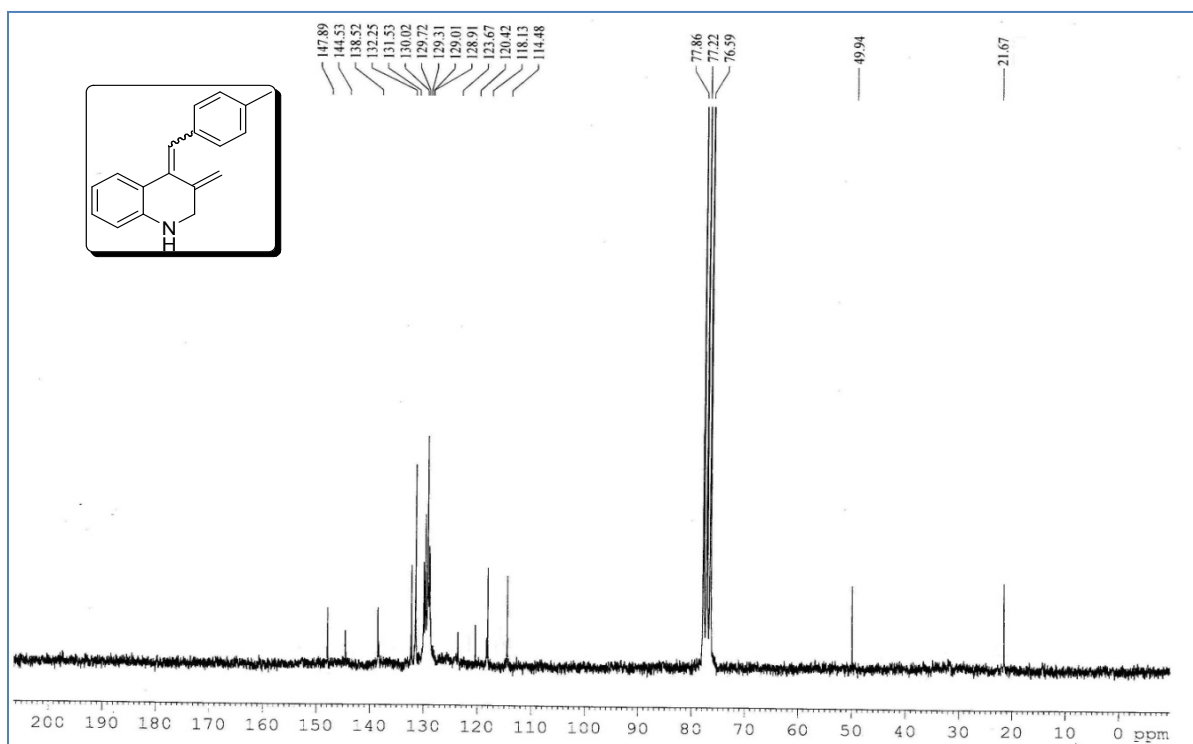

**<sup>1</sup>H NMR (CDCl<sub>3</sub>, 200 MHz) Spectrum of (3c):**

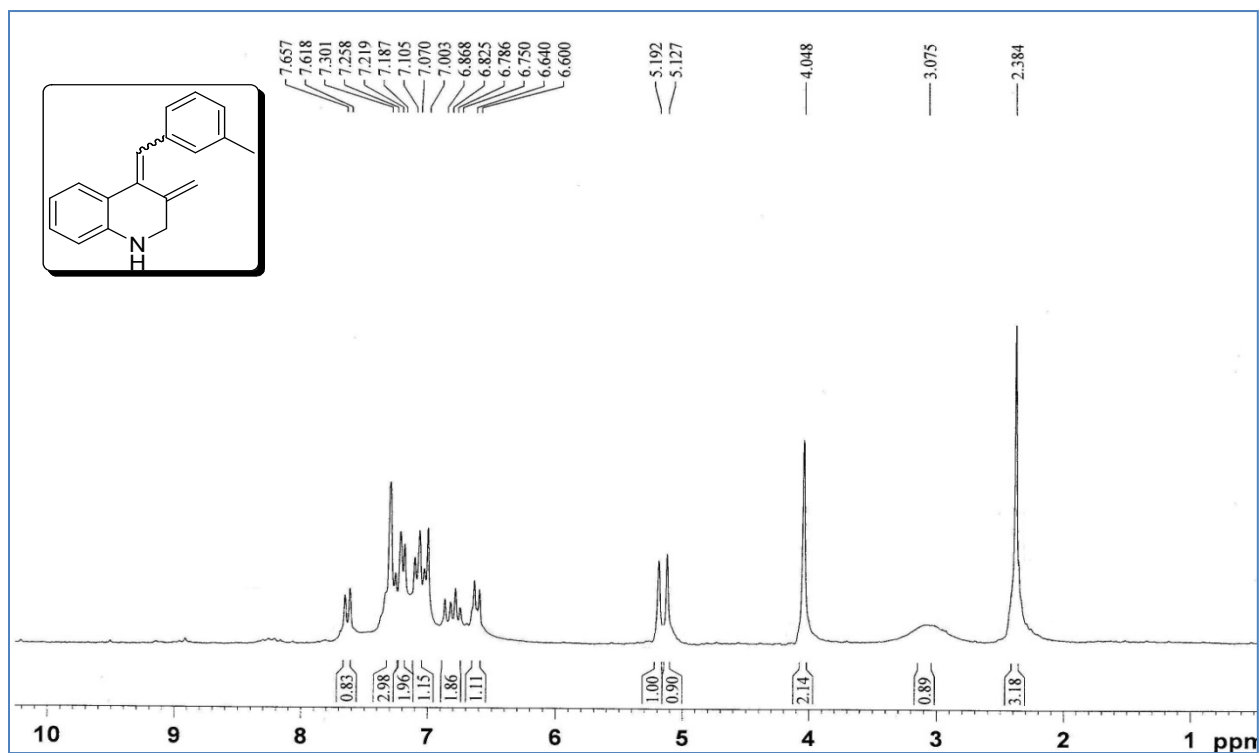

**<sup>13</sup>C NMR (CDCl<sub>3</sub>, 50 MHz) Spectrum of (3c):**

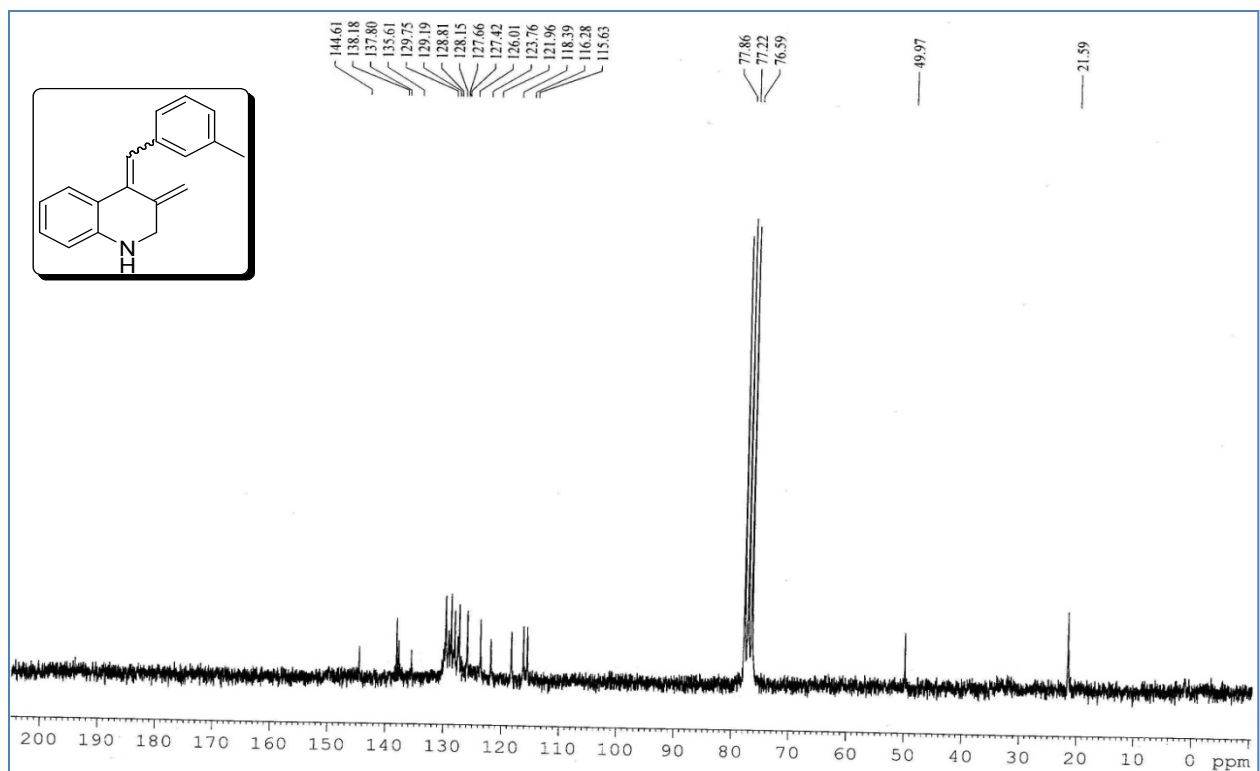

**<sup>1</sup>H NMR (CDCl<sub>3</sub>, 200 MHz) Spectrum of (3d):**

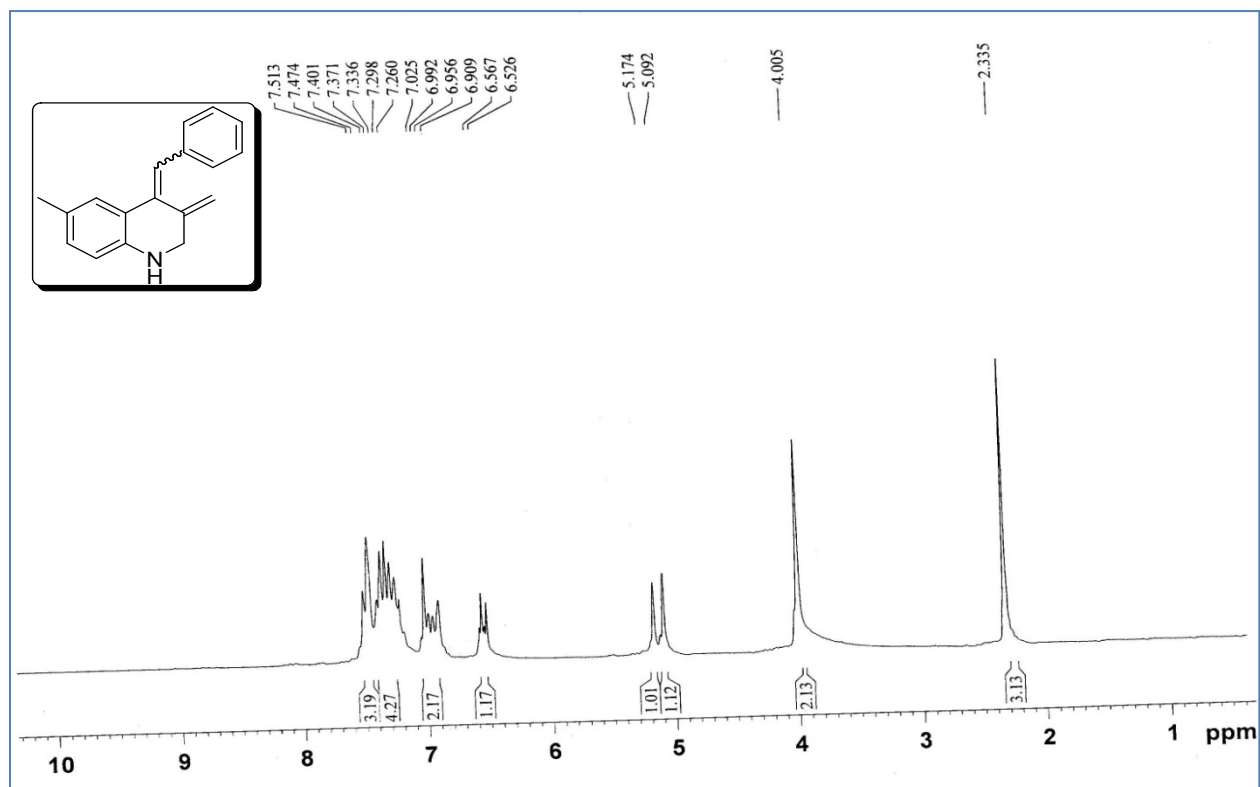

**<sup>13</sup>C NMR (CDCl<sub>3</sub>, 50 MHz) Spectrum of (3d):**

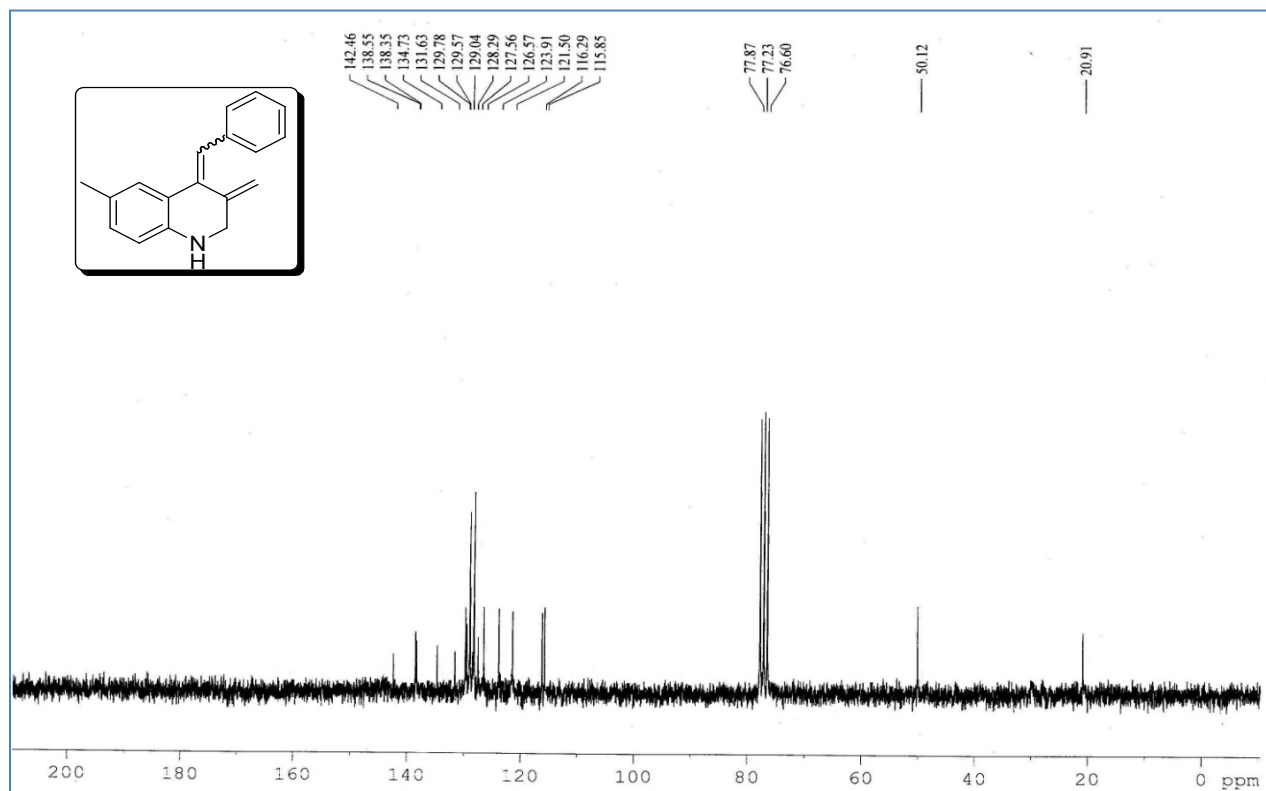

**<sup>1</sup>H NMR (CDCl<sub>3</sub>, 200 MHz) Spectrum of (3e):**

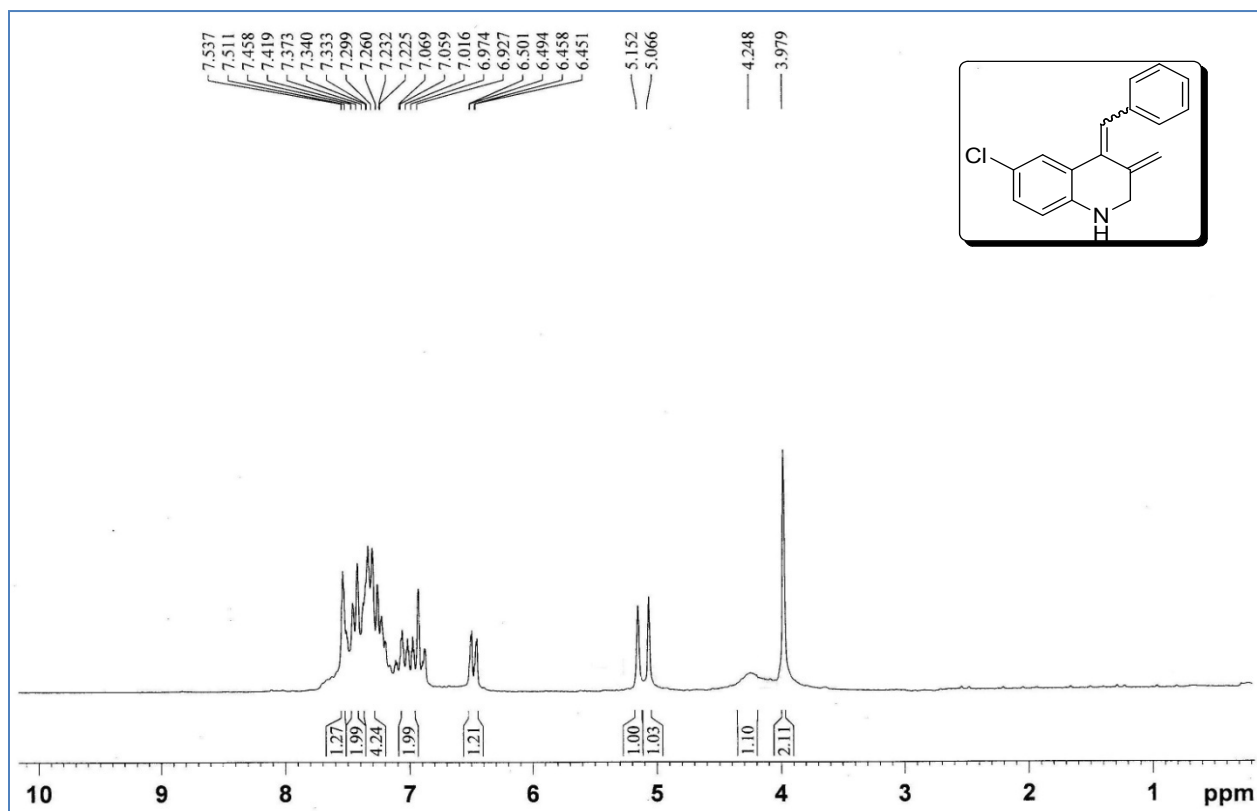

**<sup>13</sup>C NMR (CDCl<sub>3</sub>, 50 MHz) Spectrum of (3e):**

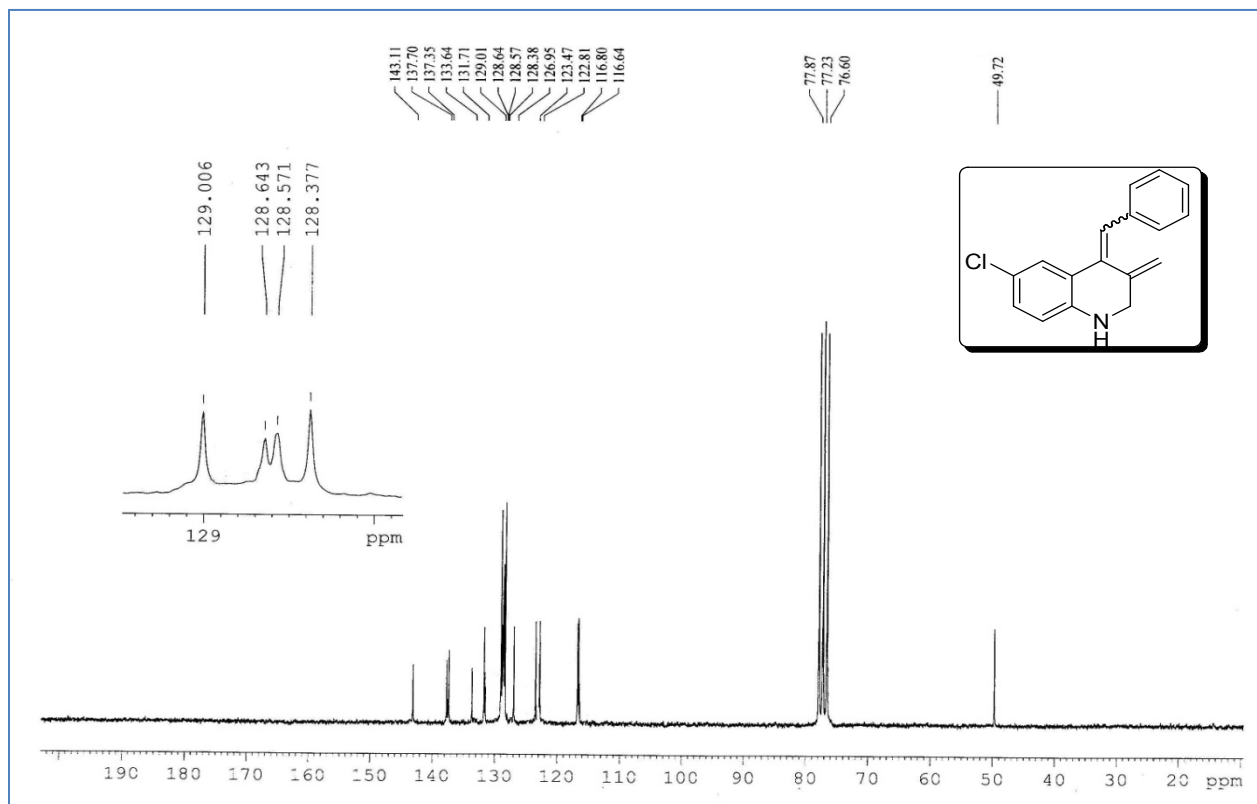

**<sup>1</sup>H NMR (CDCl<sub>3</sub>, 200 MHz) Spectrum of (3f):**

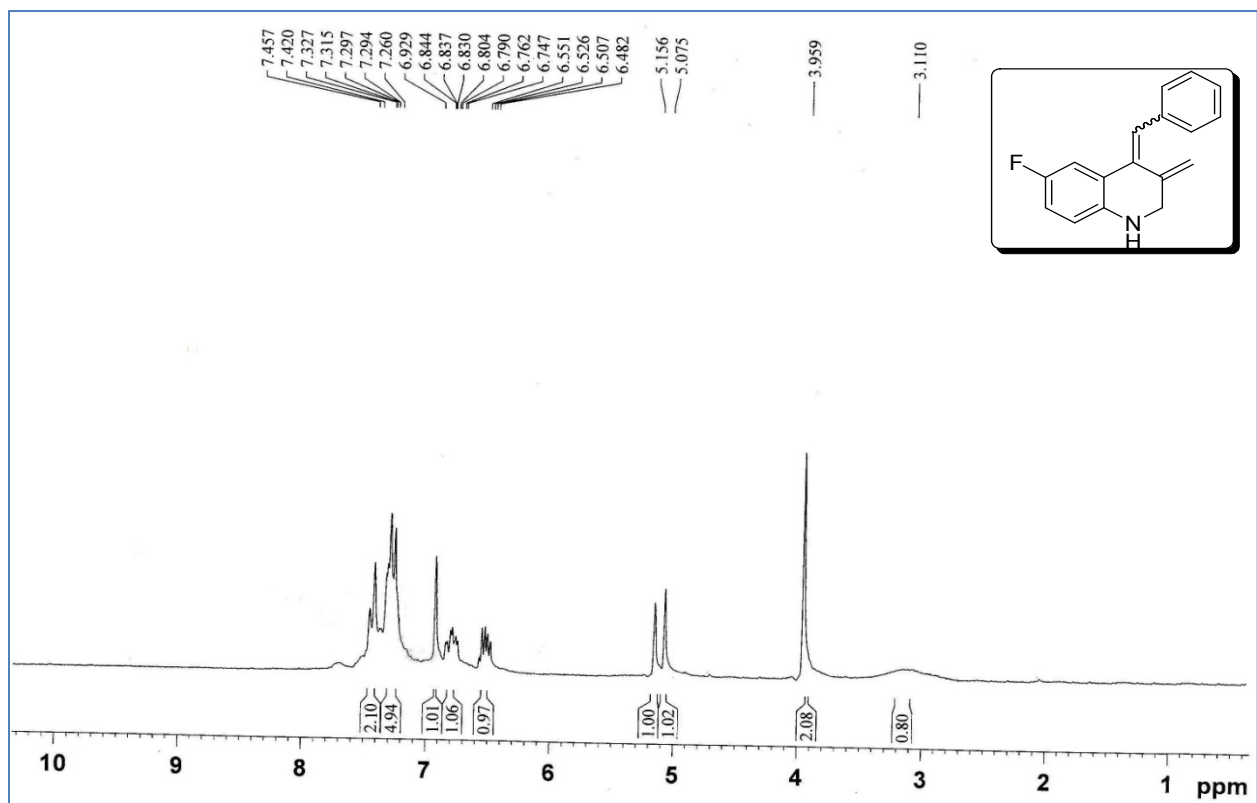

**<sup>13</sup>C NMR (CDCl<sub>3</sub>, 50 MHz) Spectrum of (3f):**

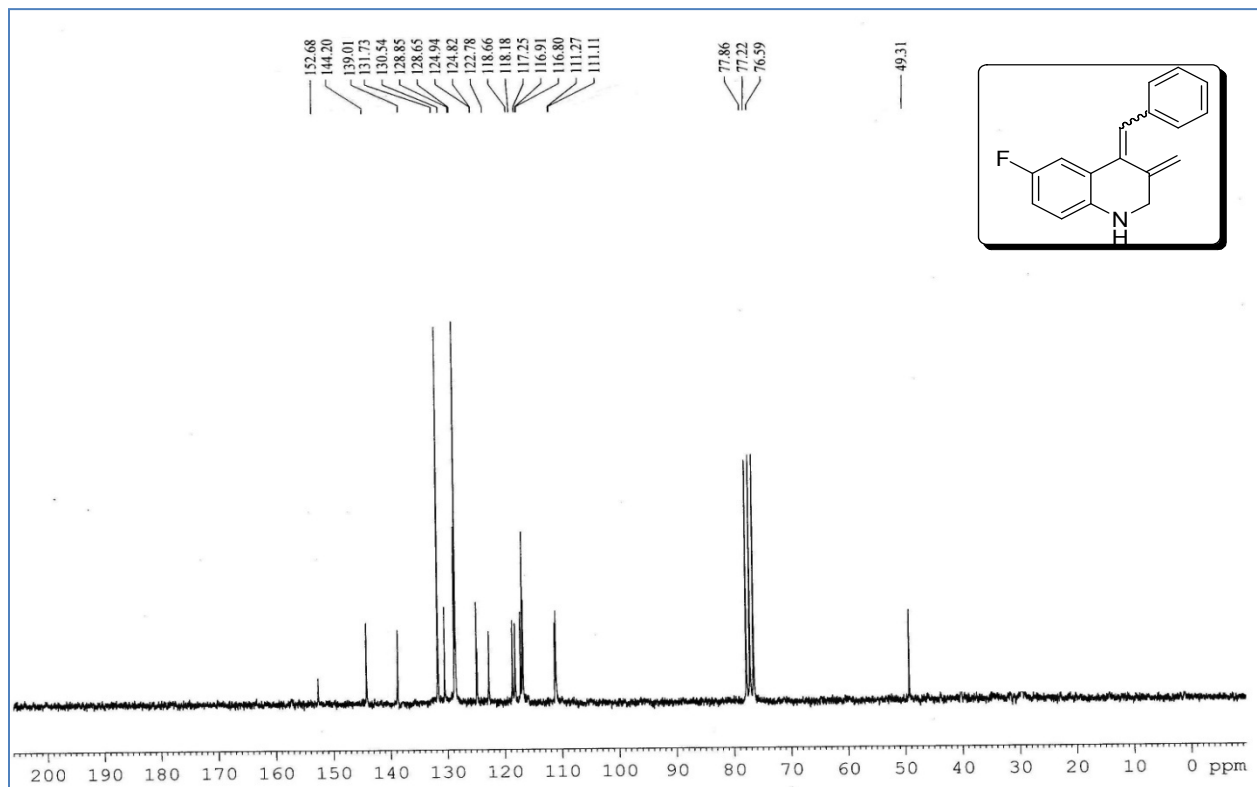

**<sup>1</sup>H NMR (CDCl<sub>3</sub>, 200 MHz) Spectrum of (3g):**

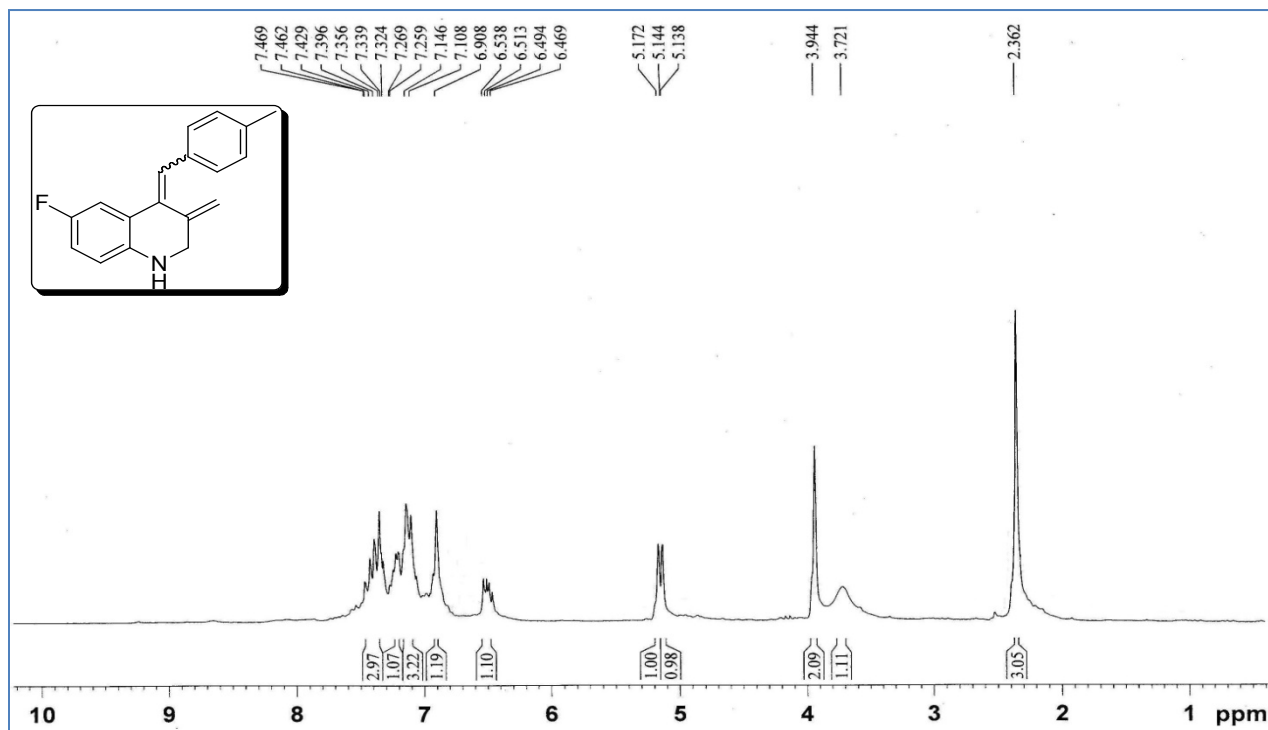

**<sup>13</sup>C NMR (CDCl<sub>3</sub>, 50 MHz) Spectrum of (3g):**

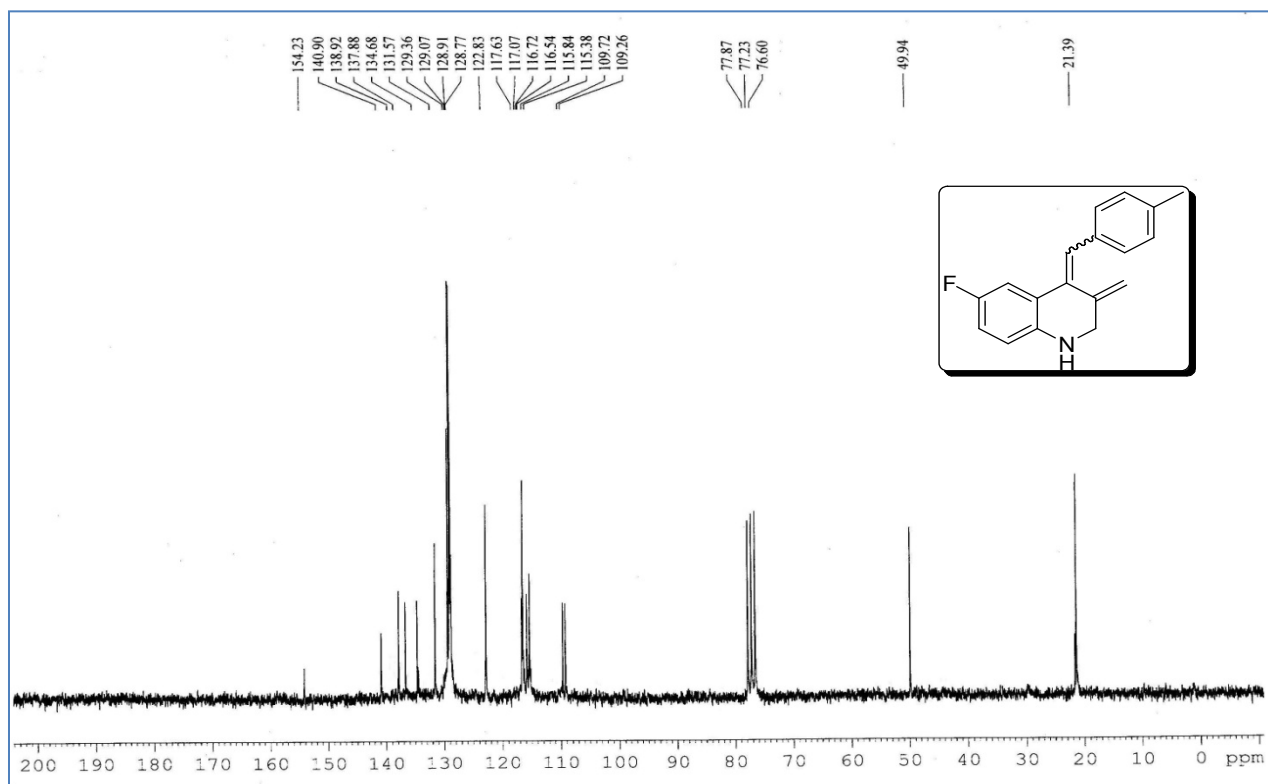

**<sup>1</sup>H NMR (CDCl<sub>3</sub>, 200 MHz) Spectrum of (3h):**

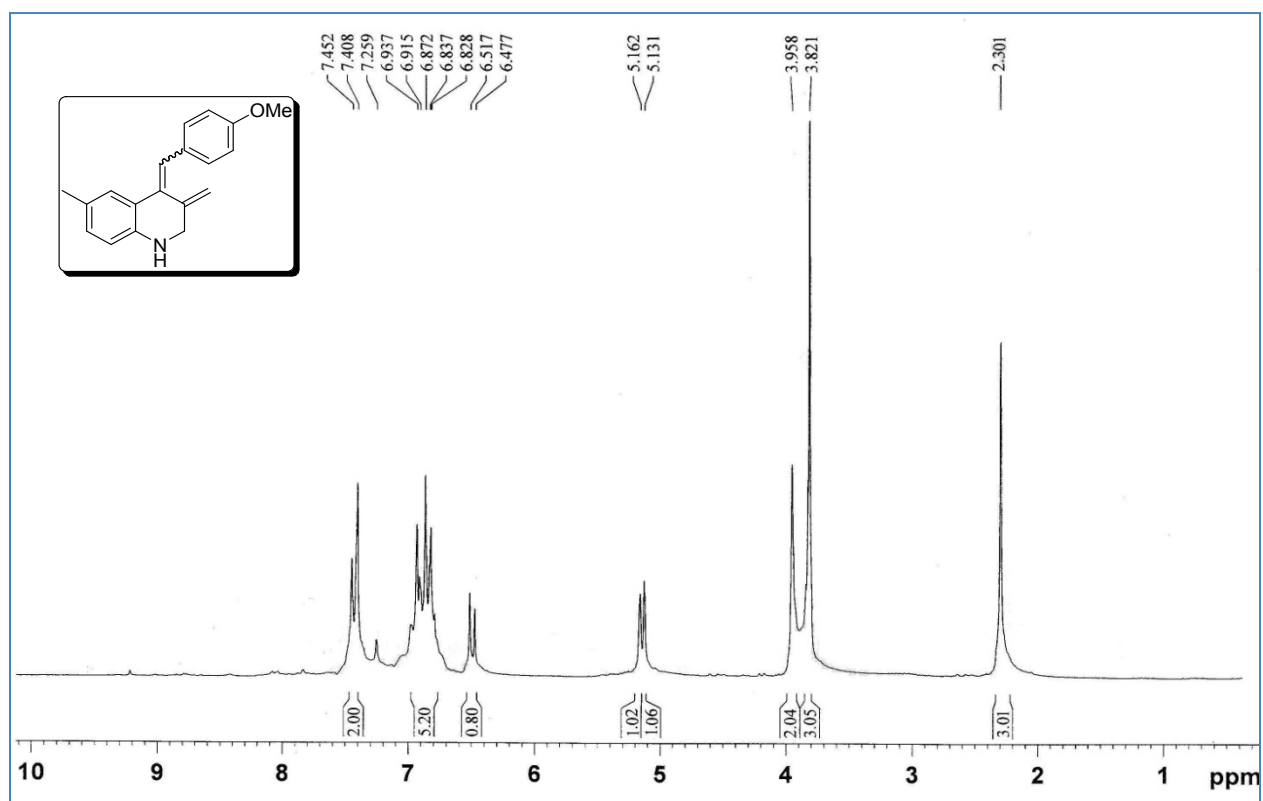

**<sup>13</sup>C NMR (CDCl<sub>3</sub>, 50 MHz) Spectrum of (3h):**

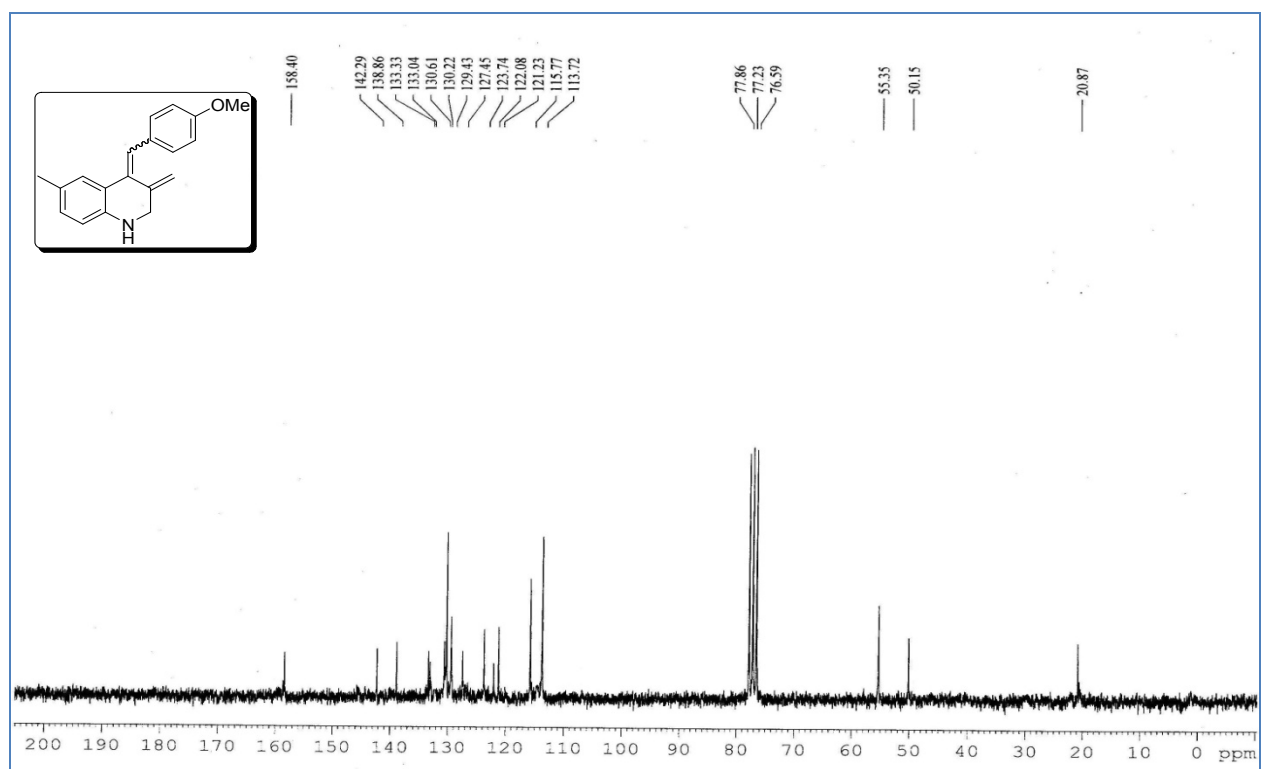



**<sup>1</sup>H NMR (CDCl<sub>3</sub>, 200 MHz) Spectrum of (3i):**

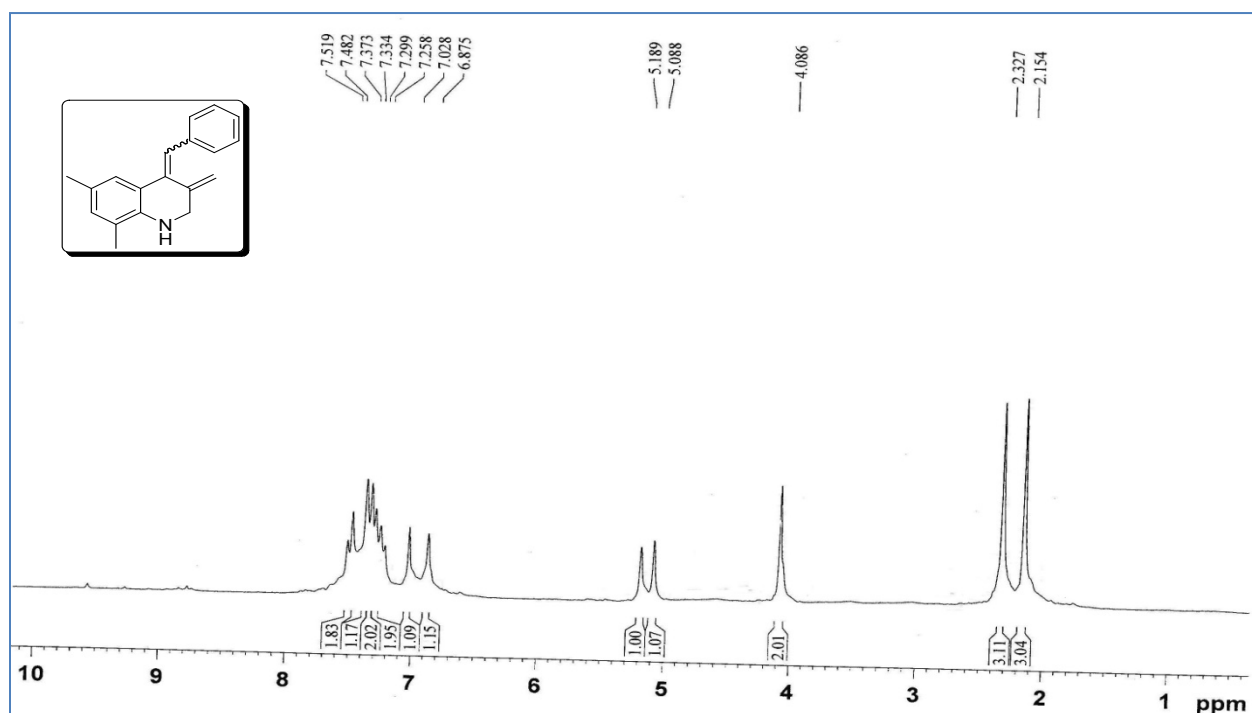

**<sup>13</sup>C NMR (CDCl<sub>3</sub>, 50 MHz) Spectrum of (3i):**

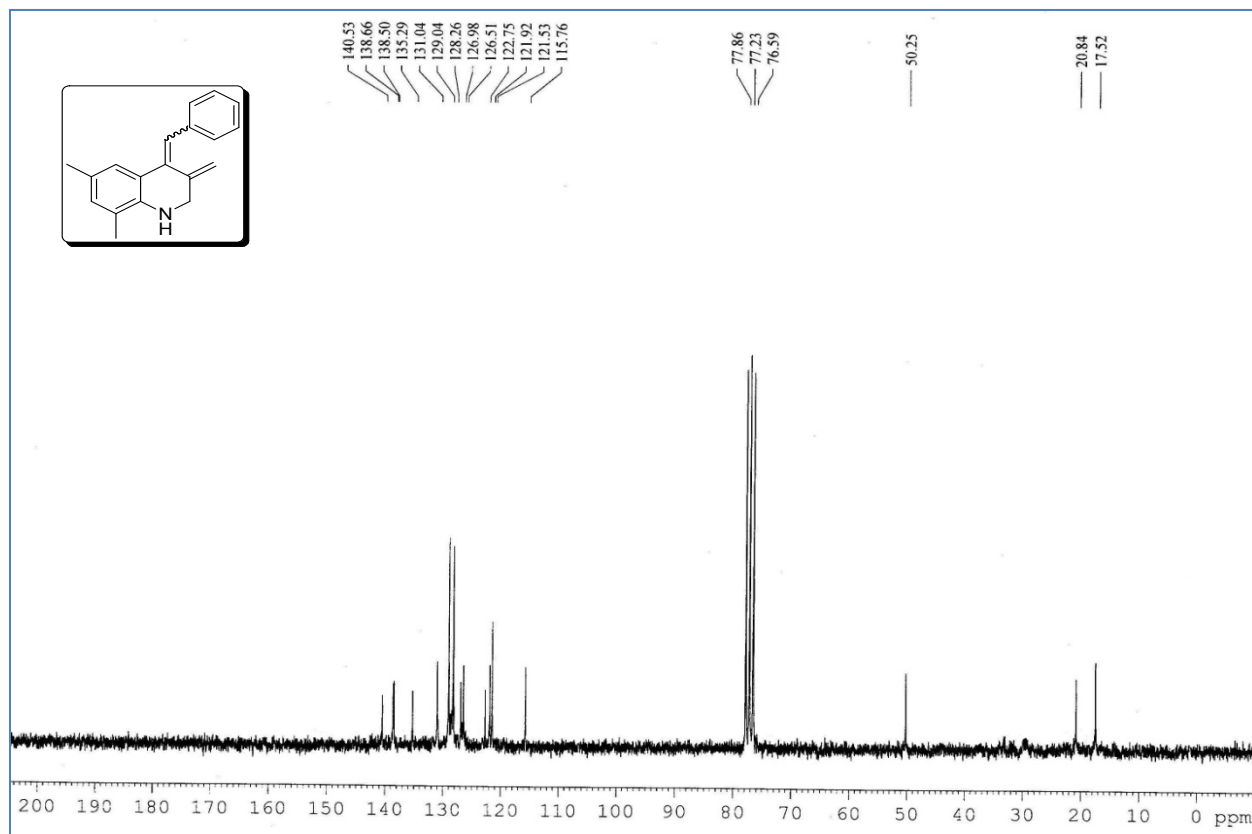

**<sup>1</sup>H NMR (CDCl<sub>3</sub>, 200 MHz) Spectrum of (3j):**

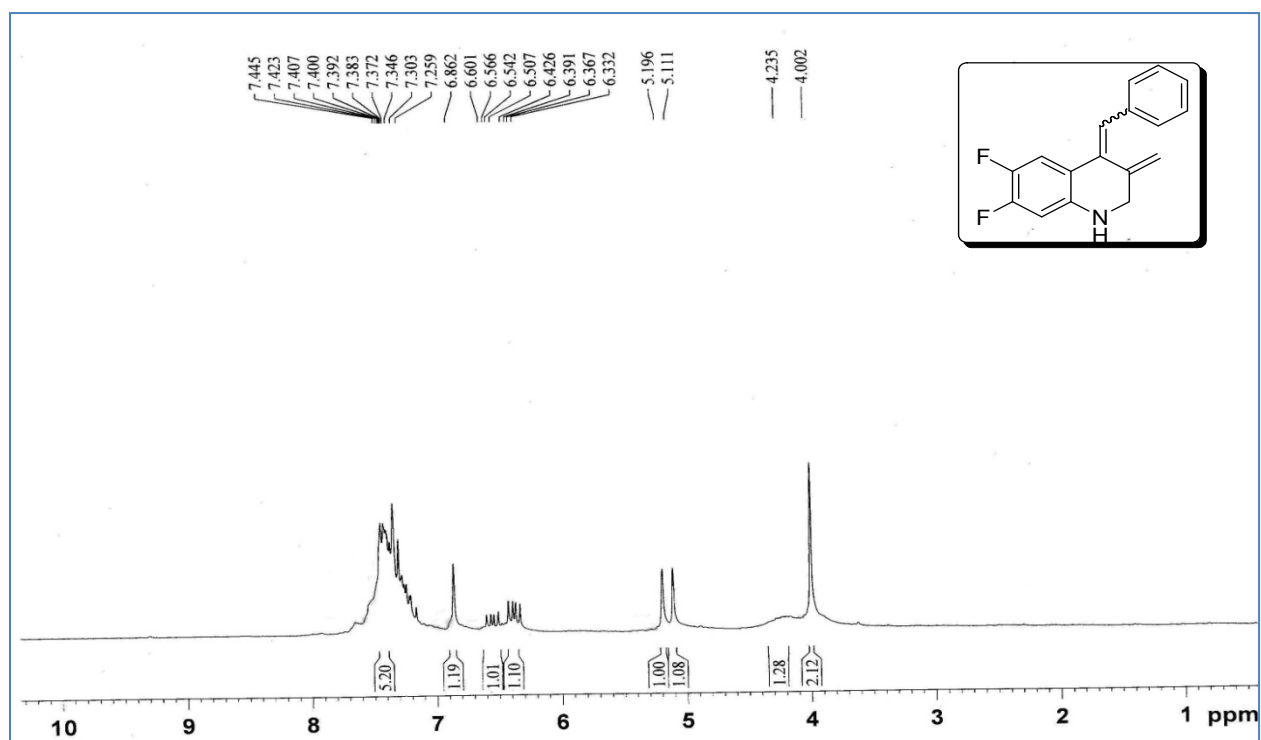

**<sup>13</sup>C NMR (CDCl<sub>3</sub>, 50 MHz) Spectrum of (3j):**

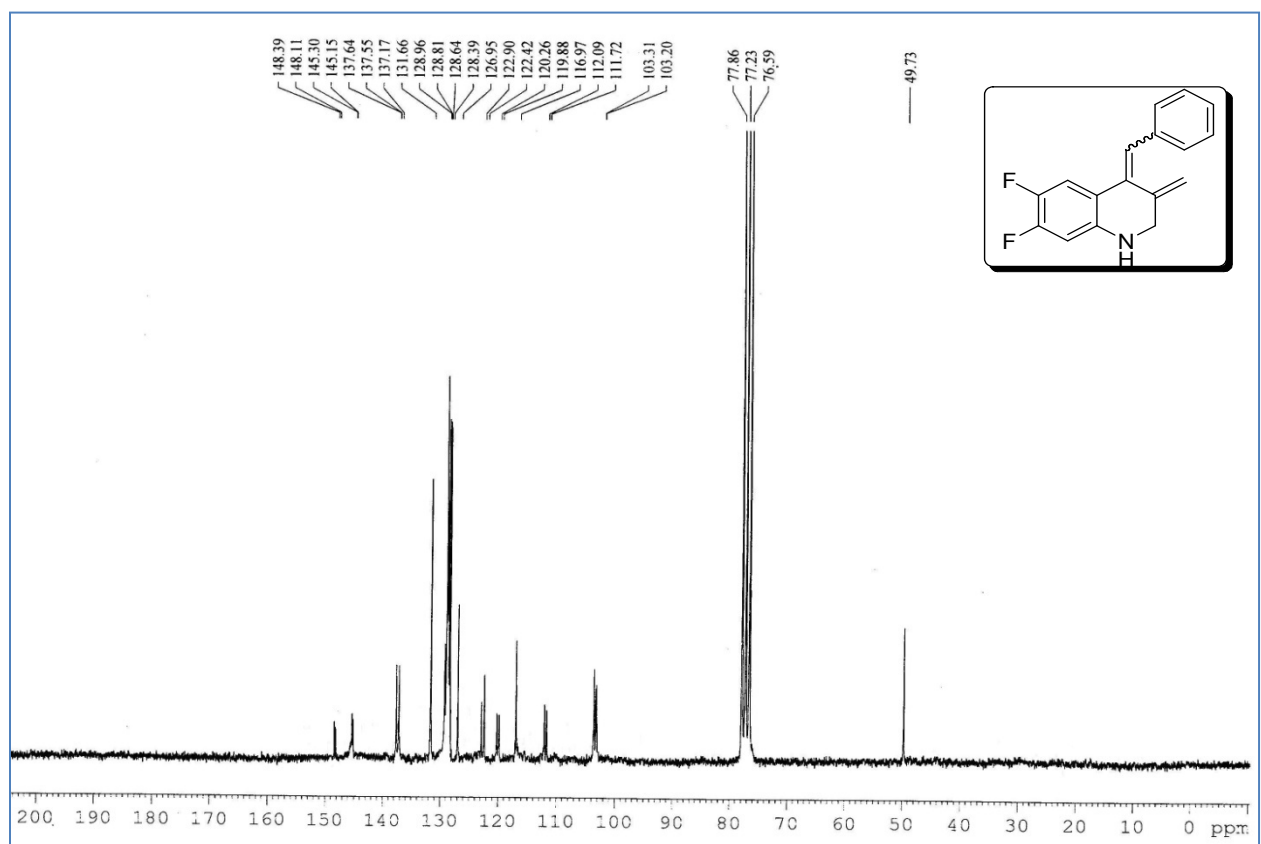

**<sup>1</sup>H NMR (CDCl<sub>3</sub>, 200 MHz) Spectrum of (3k):**

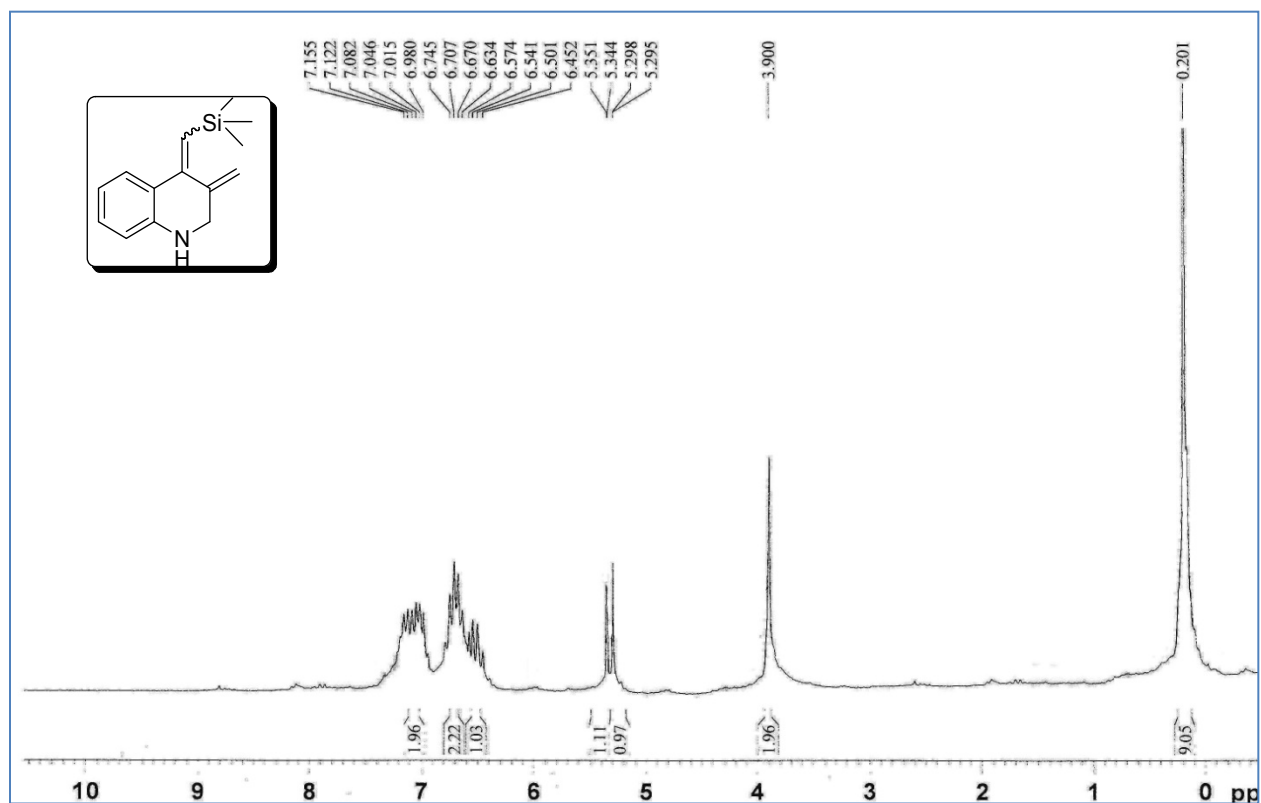

**<sup>13</sup>C NMR (CDCl<sub>3</sub>, 50 MHz) Spectrum of (3k):**

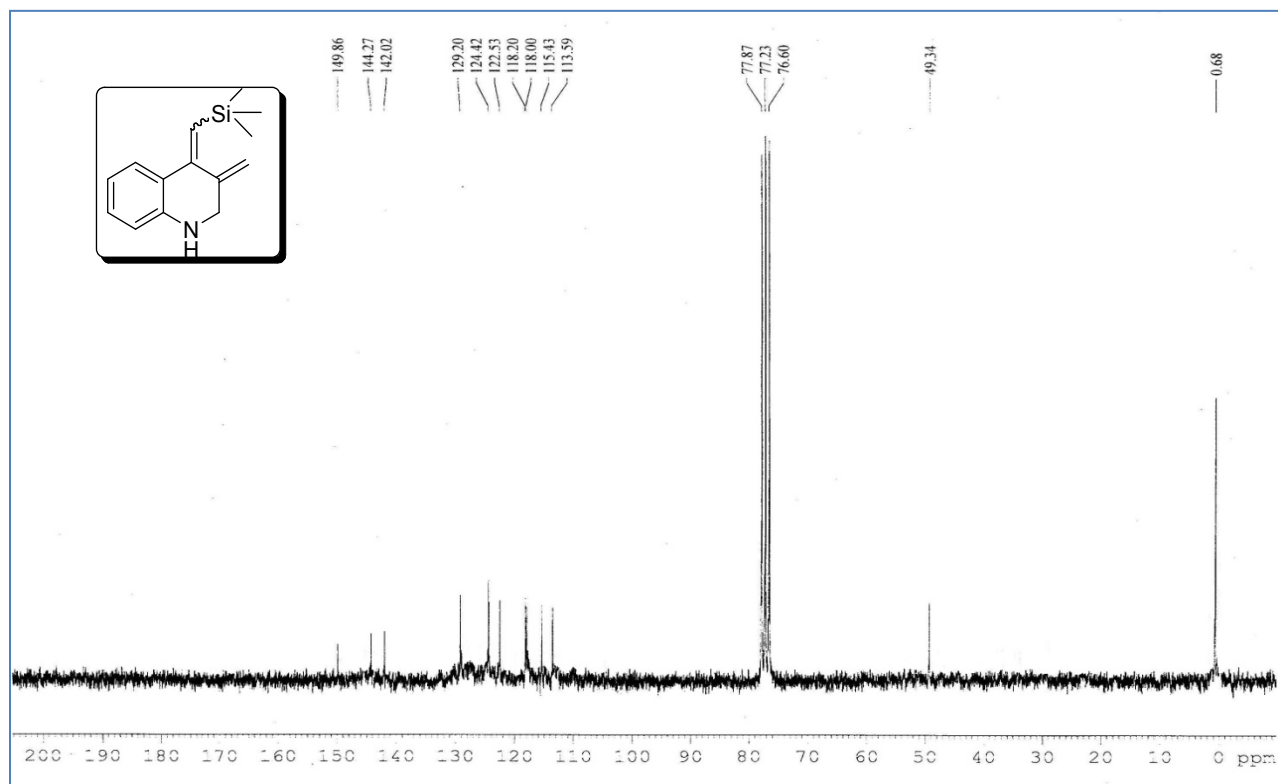

**<sup>1</sup>H NMR (CDCl<sub>3</sub>, 200 MHz) Spectrum of (3l):**

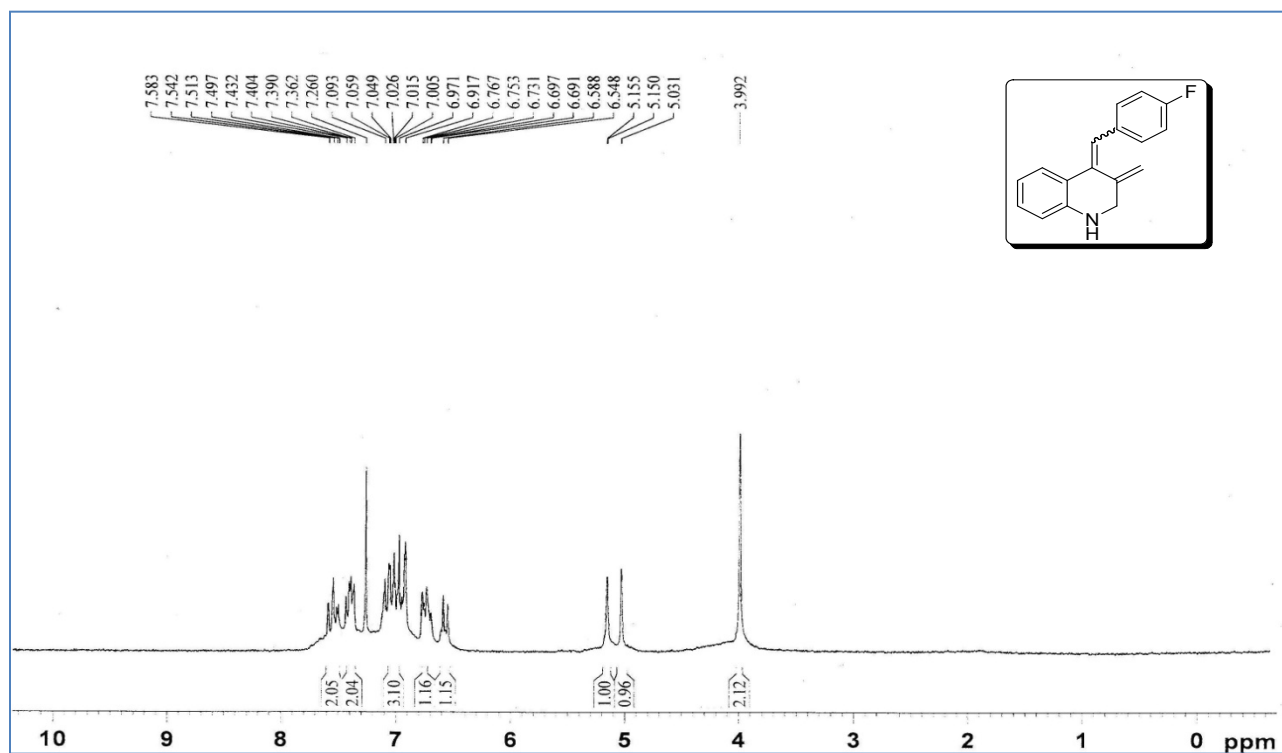

**<sup>13</sup>C NMR (CDCl<sub>3</sub>, 50 MHz) Spectrum of (3l):**

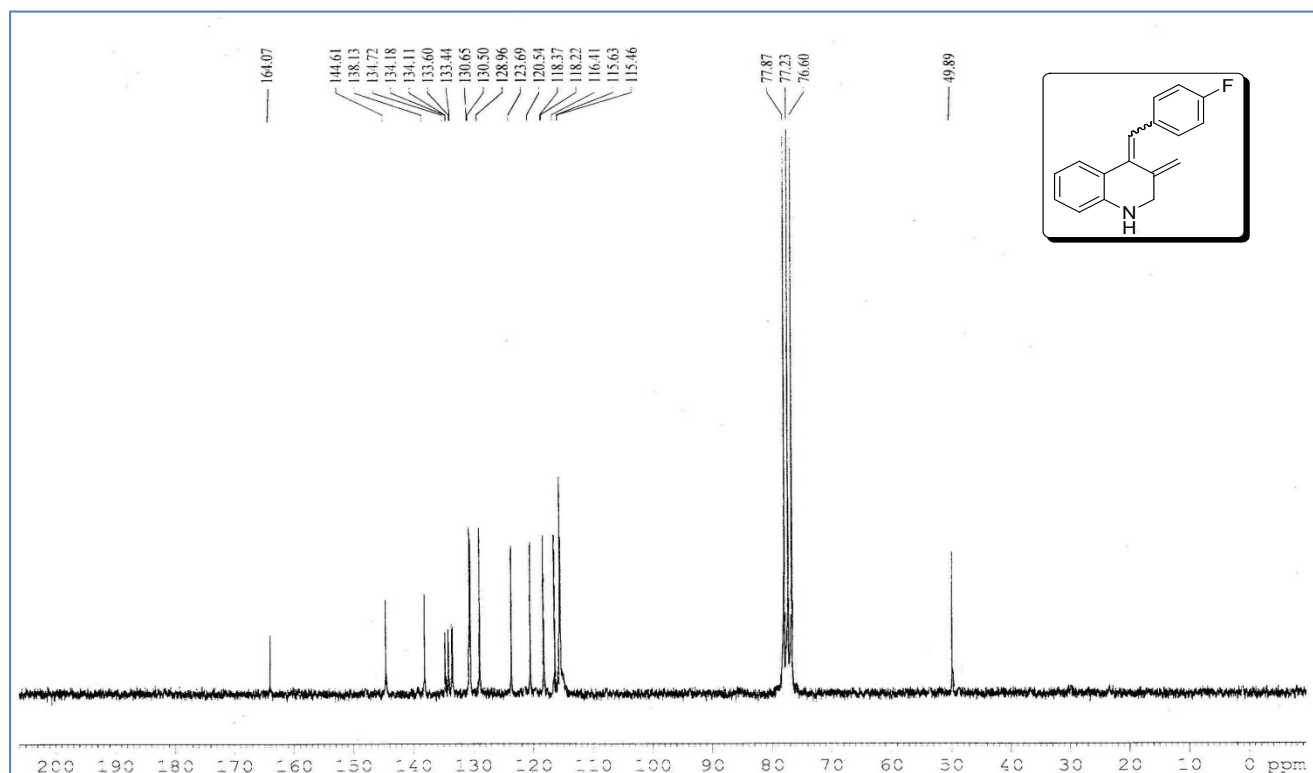

**<sup>1</sup>H NMR (CDCl<sub>3</sub>, 200 MHz) Spectrum of (3m):**

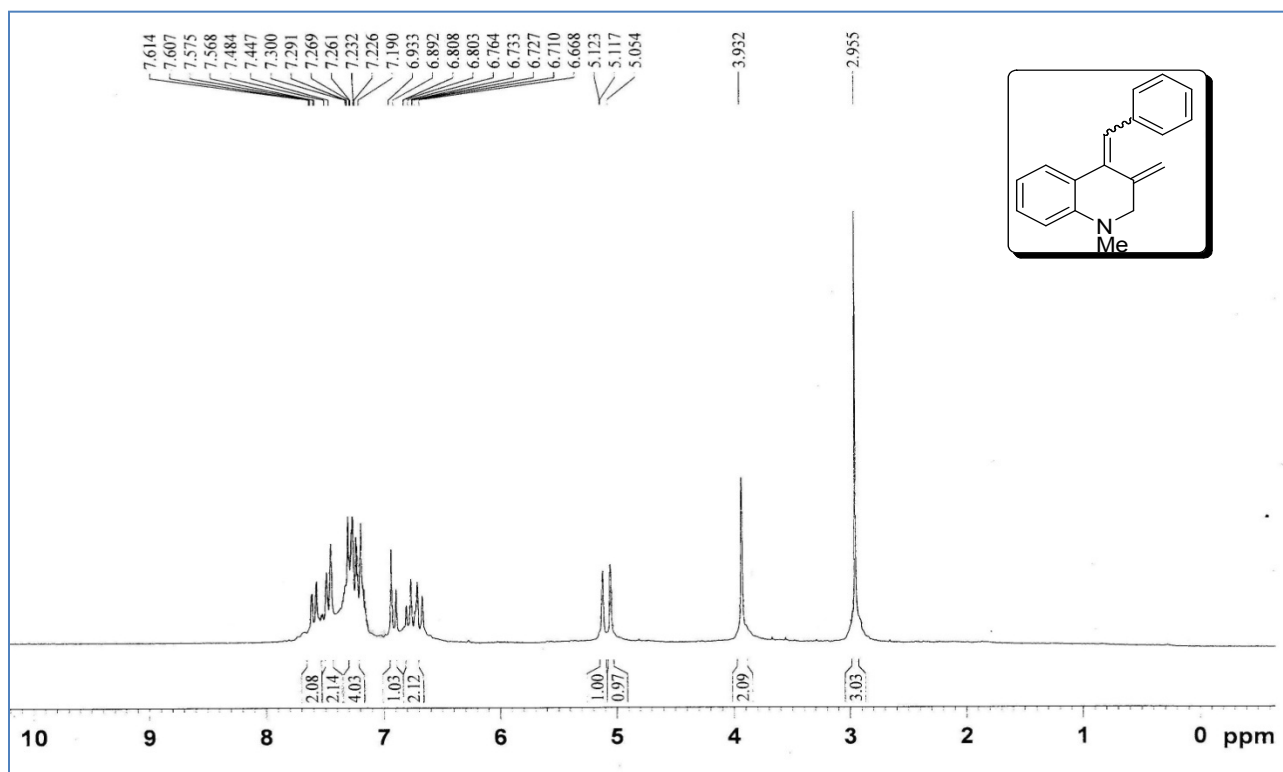

**<sup>13</sup>C NMR (CDCl<sub>3</sub>, 50 MHz) Spectrum of (3m):**

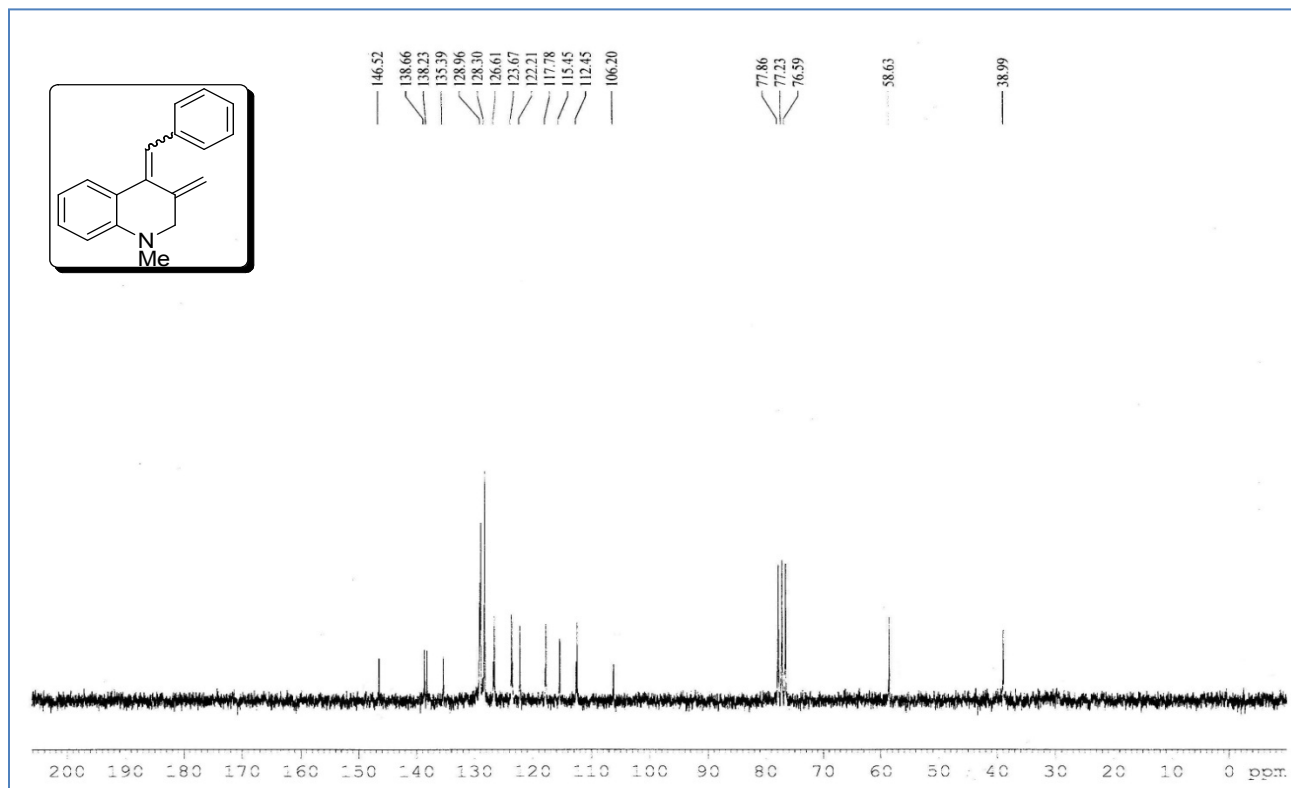

Supplement: c4ra05900j1.pdf [file c4ra05900j1.pdf]
